1 **Title**

2 **Subthalamic nucleus stabilizes movements by reducing neural spike variability in monkey**

3 **basal ganglia: chemogenetic study**

4 Taku Hasegawa (ID 0000-0003-4837-0855)<sup>1</sup>, Satomi Chiken (ID 0000-0002-2679-9530)<sup>1,2</sup>, Kenta

5 Kobayashi (ID 0000-0002-7389-3693)<sup>3</sup>, Atsushi Nambu (ID 0000-0003-2153-5445)<sup>1,2,3\*</sup>

6

7 <sup>1</sup>Division of System Neurophysiology, National Institute for Physiological Sciences, Okazaki, Aichi

8 444-8585, Japan

9 <sup>2</sup>Department of Physiological Sciences, SOKENDAI, Okazaki, Aichi 444-8585, Japan

10 <sup>3</sup>Section of Viral Vector Development, National Institute for Physiological Sciences, Okazaki, Aichi

11 444-8585, Japan

12 \*Correspondence: [nambu@nips.ac.jp](mailto:nambu@nips.ac.jp)

13 **Abstracts**

14 The subthalamic nucleus (STN) projects to the external pallidum (GPe) and internal pallidum (GPi),  
15 the relay and output nuclei of the basal ganglia (BG), respectively, and plays an indispensable role  
16 in controlling voluntary movements. To elucidate the neural mechanism by which the STN controls  
17 GPe/GPi activity and movements, we utilized a chemogenetic method to reversibly suppress the  
18 motor subregion of the STN in three macaque monkeys (*Macaca fuscata*, both sexes) engaged in  
19 reaching tasks. Systemic administration of chemogenetic ligands prolonged movement time and  
20 increased spike train variability in the GPe/GPi, but only slightly affected firing rate modulations.  
21 Across-trial analyses revealed that the irregular discharge activity in the GPe/GPi coincided with  
22 prolonged movement time. STN suppression also induced excessive abnormal movements in the  
23 contralateral forelimbs, which was preceded by STN and GPe/GPi phasic activity changes. Our  
24 results suggest that the STN stabilizes spike trains in the BG and achieves stable movements.

## 25 **Introduction**

26 The subthalamic nucleus (STN) is small, but it occupies an important position in the basal ganglia  
27 (BG) circuitry. The STN receives cortical inputs directly through the cortico-STN pathway and  
28 indirectly through the cortico-striato-external pallido (GPe)-STN pathways<sup>1</sup> and sends a  
29 glutamatergic projection to the GPe and internal pallidum (GPi). The GPe innervates all other nuclei  
30 in the BG<sup>2,3</sup>, whereas the GPi is the output nucleus of the BG<sup>4,5</sup>. Therefore, the STN affects the  
31 activity of all BG nuclei as well as the output nucleus.

32 The STN also plays pivotal roles in normal functions and disease conditions of the BG. Lesions  
33 or chemical blockade of the STN induces involuntary movements known as hemiballism<sup>6-8</sup>.  
34 Abnormal activity of STN neurons has been reported in Parkinson's disease (PD)<sup>9-12</sup>, and it is  
35 suggested that the reciprocal excitatory and inhibitory connection between the STN and GPe is the  
36 source of pathologic oscillation associated with PD<sup>13,14</sup>. Moreover, lesions or deep brain stimulation  
37 (DBS) in the STN can ameliorate the motor symptoms of PD<sup>15-17</sup>.

38 These clinical effects are consistent with the classical BG model; the cortico-striato-GPi *direct*  
39 pathway facilitates movements, whereas the cortico-STN-GPi *hyperdirect* and  
40 cortico-striato-GPe-STN-GPi *indirect* pathways suppress movements<sup>5,8,18,19</sup>. This model  
41 hypothesizes that the STN inhibits and/or cancels movements, which is supported by human  
42 neuroimaging and electrophysiologic recording/stimulation studies of the STN<sup>20-22</sup>. However, the  
43 activity of STN neurons changes in relation to simple limb or eye movements as well<sup>23,24</sup>, and such  
44 movement-related activity is not easily explained from the perspective of movement suppression. It  
45 has been argued that the STN activates antagonist muscles necessary for stopping movements, or

46 that it suppresses competing motor programs, thus allowing the *direct* pathway to release only a  
47 selected motor program<sup>18,19,25</sup>. Furthermore, pharmacologic activation of the STN induces  
48 involuntary movements on the contralateral side<sup>26,27</sup>. These previous observations suggest that the  
49 STN endows the BG circuitry with more complex neural computations than the simple dichotomy  
50 of movement facilitation and suppression.

51 To clarify the functional role of the STN in motor control, in the present study, we utilized the  
52 Designer Receptors Exclusively Activated by a Designer Drug (DREADD) technology to  
53 manipulate the neural activity in the STN of macaque monkeys. Although DREADDs have been  
54 utilized widely in rodents, only a few applications in non-human primates are reported, and  
55 electrophysiologic evaluation at the single-neuron level is lacking. Here, we showed that  
56 administration of DREADD ligands mildly suppressed STN activity, which was sufficient to induce  
57 abnormal involuntary movements and extend the movement time. Single-unit recordings revealed  
58 that pauses and spike train variability increased in both GPe and GPi neurons, whereas their  
59 movement-related activity was slightly affected. Our findings thus suggest a novel role for the STN  
60 in stabilizing spike trains in the GPe/GPi to achieve stable motor control.

## 61 **Results**

### 62 **Mild suppression of STN activity using DREADD**

63 The STN motor subregion involved in control of the forelimbs was identified based on neuronal  
64 responses to electrical stimulation of the forelimb regions of the primary motor cortex (M1) and  
65 supplementary motor area (SMA), i.e., biphasic early and late excitation via the cortico-STN  
66 *hyperdirect* and cortico-striato-GPe-STN *indirect* pathways, respectively (Fig. 1a, magenta and  
67 green arrows)<sup>1,28,29</sup>. An adeno-associated virus (AAV) vector that co-expresses an inhibitory  
68 DREADD receptor, hM4Di, and enhanced green fluorescent protein (EGFP) was injected  
69 unilaterally into the identified STN motor subregion. Histologic examination of monkeys E and K  
70 revealed EGFP expression in the dorsolateral part of the posterior STN (Fig. 1b and Supplementary  
71 Fig. 1), corresponding to the motor subregion<sup>24,29-31</sup>.

72 After receptor expression (>3 weeks), neuronal recordings and behavioral observations were  
73 initiated. A ligand for hM4Di, clozapine N-oxide (CNO; 1 mg/kg, i.v., to monkey E) or newly  
74 developed deschloroclozapine (DCZ; 0.1 mg/kg, i.m., to monkeys K and U)<sup>32</sup>, was administered  
75 systemically. The efficacy of chemogenetic suppression was determined by recording unit activity  
76 in the STN. The baseline firing rates of the STN neurons began to decrease at 15 min after  
77 administration of CNO and 5 min after DCZ administration (Fig. 1c), consistent with the rapid  
78 delivery of DCZ to the brain<sup>32</sup>. The firing rates decreased to 65-75% of the rates before ligand  
79 administration (monkey E,  $75.4 \pm 7.9\%$ ,  $P < 0.001$ ,  $n = 12$ ; monkey K,  $71.2 \pm 4.8\%$ ,  $P < 0.001$ ,  $n =$   
80  $24$ ; monkey U,  $65.8 \pm 5.4\%$ ,  $P < 0.001$ ,  $n = 20$ ; Wilcoxon signed rank test), whereas administration  
81 of vehicle had no effect (monkey K,  $91.2 \pm 7.9\%$ ,  $P = 0.1$ ,  $n = 15$ ).

82 Lesions or chemical blockade of the STN induces involuntary movements known as  
83 hemiballism<sup>6-8</sup>. In the present study, administration of DREADD ligands induced involuntary  
84 movements in all three monkeys, i.e., irregular repetitive movements in the contralateral arms  
85 without clear purpose while the monkeys sat quietly in a chair without performing any task  
86 (Supplementary Video 1; monkey E; occurrence rate, 0.77 min<sup>-1</sup>; duration, 19.0 ± 16.9 s, mean ±  
87 SD). No abnormal movements were noted with other body parts, such as the eyes, hindlimbs, or  
88 contralateral forelimb. The involuntary movements began approximately 20 min (CNO) or 5 min  
89 (DCZ) after ligand administration and continued for >2 h. Involuntary movements following ligand  
90 administration were observed repeatedly throughout the experimental periods (58, 85, and 75 weeks  
91 after AAV vector injection in monkeys E, K, and U, respectively). These histologic,  
92 electrophysiologic, and behavioral observations indicated that the forelimb motor subregion of the  
93 STN was successfully targeted and that DREADD expression was stable for >1 year.

94

### 95 **Movements disturbed by STN suppression**

96 Each monkey was trained to perform a reach-and-pull task composed of externally triggered (ET)  
97 and self-initiated (SI) trials using its contralateral hand (Fig. 2a); the monkey was required to  
98 initiate reaching either immediately after ‘Go’ cue presentation in ET trials or with a delay of 1.5 s  
99 without any explicit Go cue in SI trials. ET and SI trials were randomly presented, and the trial type  
100 was indicated by the color of an LED (Task cue): blue for ET trials and red for SI trials. In ET trials,  
101 the blue LED turned green (Go cue) with a delay of 1-2 s, and then the monkey must release the  
102 home lever within 0.5 s and pull the front lever to be rewarded. In SI trials, the monkey must wait

103 and maintain the home position for >1.5 s after Task cue and then initiate reaching movements.

104 After CNO or DCZ administration, reaching motions became unstable, and the monkeys required

105 more time to grab the front lever in some ET and SI trials, as observed by an increase in movement

106 time (MT) in all three monkeys (Fig. 2b *right*;  $P < 0.01$  for all monkeys in both ET and SI trials;

107 Wilcoxon signed rank test;  $n = 14, 15,$  and  $20$  for monkeys E, K, and U, respectively). The success

108 rate (Fig. 2b *left*; monkey E,  $P < 0.05$ ; monkey U,  $P < 0.01$ ) and reaction time (RT; Fig. 2b *middle*;

109 monkey E,  $P < 0.05$ ; monkey U,  $P < 0.01$ ) of monkeys E and U decreased in SI trials. There was no

110 change in the success rate and RT in the ET trials, except for a decrease in RT of monkey U (Fig. 2b

111 *middle*;  $P < 0.05$ ). No significant effects were observed on the success rate, RT, or MT after vehicle

112 administration (Supplementary Fig. 2a;  $P > 0.05$  for all monkeys in both ET and SI trials; Wilcoxon

113 signed rank test;  $n = 8, 12,$  and  $10$  for monkeys E, K and U, respectively), or in task performance

114 using the ipsilateral hand (Supplementary Fig. 2b;  $P > 0.05$  for all monkeys in both ET and SI trials;

115  $n = 8, 9,$  and  $9$ ), indicating that any off-target effects of the DREADD ligands or their effects on

116 STN non-motor functions were minimal.

117 Three-dimensional (3D) trajectories of the contralateral shoulder, elbow, wrist, and hand during

118 reaching movements were reconstructed from RGB (x-y) and depth (z) images in monkeys K and U

119 (Supplementary Fig. 3), and trajectories of the wrist position were statistically analyzed (Fig. 2c).

120 The trajectory deviation increased in both monkeys (Fig. 2c *left* Movement): monkey K (ET trials,  $P$

121  $< 10^{-39}$ ,  $n = 179$ ; SI trials,  $P < 10^{-28}$ ,  $n = 155$ ; Mann-Whitney  $U$  test) and monkey U (ET,  $P < 10^{-14}$ ,

122  $n = 101$ ; SI,  $P < 10^{-8}$ ,  $n = 103$ ). The maximum speed increased in both monkeys (Fig. 2c *middle*

123 Movement): monkey K (ET,  $P < 0.01$ ; SI,  $P < 0.01$ ) and monkey U (ET,  $P < 10^{-8}$ ; SI,  $P < 10^{-5}$ ). The

124 trajectory tortuosity, a measure of the bending and curving of a path, increased in monkey K (Fig.  
125 *2c right*; ET,  $P < 10^{-16}$ ; SI,  $P < 10^{-9}$ ) but not monkey U (ET,  $P = 0.6$ ; SI,  $P = 0.5$ ). These results  
126 indicate that the longer MT in the POST period (Fig. *2b right*) was due to high variability in  
127 reaching movements, rather than slow movements. In addition, analysis of the trajectory during the  
128 delay period (i.e., at rest) revealed task-irrelevant involuntary movements. The trajectory deviation  
129 increased in both monkeys (Fig. *2c left Rest*): monkey K (ET,  $P < 10^{-47}$ ; SI,  $P < 10^{-40}$ ) and monkey  
130 U (ET,  $P < 10^{-12}$ ; SI,  $P < 10^{-13}$ ). In addition, the maximum speed increased in both monkeys (Fig.  
131 *2c middle Rest*): monkey K (ET,  $P < 10^{-7}$ ; SI,  $P < 10^{-5}$ ) and monkey U (ET,  $P < 10^{-4}$ ; SI,  $P < 0.05$ ).  
132 These changes were not observed in either monkey after vehicle administration: monkey K  
133 (Supplementary Fig. 2c;  $P > 0.05$  for all measures and conditions;  $n = 74$  ET and 70 SI trials) and  
134 monkey U ( $P > 0.05$ ;  $n = 45$  ET and 54 SI trials). Thus, excessive movements occurred both during  
135 movements and at rest, resulting in disturbed reaching and involuntary movements, respectively.

136 Involuntary movements were also detected as fluctuations of the home lever position at rest in  
137 monkeys K and U. In both monkeys, involuntary movements became more frequent in the POST  
138 period before and after Task cue in both ET and SI trials (Fig. 2d). A significant increase in the  
139 occurrence of fluctuations was observed before Task cue (Fig. 2e; monkey K, from 2.5% to 7.2%,  $P$   
140  $< 10^{-4}$ ,  $n = 44$ ; monkey U, from 5.4% to 15.0%,  $P < 10^{-4}$ ; Wilcoxon signed rank test), after Task cue  
141 in ET trials (monkey K, from 4.5% to 13.6%,  $P < 10^{-5}$ ; monkey U, from 9.5% to 20.0%,  $P < 10^{-4}$ ),  
142 and after Task cue in SI trials (monkey K, from 5.3% to 14.2%,  $P < 10^{-5}$ ; monkey U, from 9.2% to  
143 21.0%,  $P < 0.001$ ).

144 Electromyogram (EMG) of the biceps brachii and triceps brachii muscles of monkeys K and U



145 was obtained during the task (Supplementary Fig. 4). Task-irrelevant phasic EMG activity was  
146 observed, corresponding to involuntary movements. In the POST period, abnormal EMG activity  
147 was induced more frequently after Task cue, and the movement-related EMG activity tended to  
148 increase, consistent with the abovementioned trajectory analyses.

149

### 150 **Diminished cortically evoked responses in GPe/GPi neurons by STN suppression**

151 Single-unit GPe/GPi activity was recorded using a 16-channel linear electrode in 78 sessions. Of  
152 198 neurons (101 GPe and 97 GPi) examined, 165 (83 GPe and 82 GPi) responded to M1 and/or  
153 SMA stimulation and were classified as ‘high-frequency discharge and pause’ (HFD-P) GPe,  
154 ‘low-frequency discharge and burst’ (LFD-B) GPe, ‘high-frequency discharge’ (HFD) GPi, or  
155 ‘low-frequency discharge’ neurons based on firing rates and patterns (Table 1)<sup>33</sup>. HFD-P GPe  
156 neurons (79/83) and HFD GPi neurons (78/82) were major and further analyzed, whereas LFD-B  
157 GPe neurons (4/83) are shown separately (Supplementary Fig. 5). STN activity was also recorded in  
158 another 32 sessions. Of 59 STN neurons examined, 44 responded to M1 and/or SMA stimulation  
159 (Table 1).

160 To examine how STN suppression reduces cortical inputs to the GPe/GPi through the STN,  
161 neuronal responses to cortical stimulation in the STN and GPe/GPi were recorded (Supplementary  
162 Fig. 6). During the PRE period, the typical response of GPe/GPi neurons was triphasic, consisting  
163 of early excitation, inhibition, and late excitation phases, conveyed through the  
164 cortico-STN-GPe/GPi, cortico-striato-GPe/GPi, and cortico-striato-GPe-STN-GPe/GPi pathways,  
165 respectively<sup>8,34</sup>. During the POST period, early excitation was diminished, and inhibition enhanced

166 (Supplementary Fig. 6a-c *middle* and *bottom*), suggesting that excitatory inputs from the STN to the  
167 GPe/GPi were reduced and that inhibitory inputs from the striatum were relatively enhanced.  
168 Baseline activity decreased significantly in the GPe but not GPi. Hence, STN suppression reduced  
169 the efficiency of information transmission from the cortex to the GPe/GPi via the STN as well as  
170 the baseline activity of the GPe.

171

### 172 **GPe/GPi movement-related activity weakly affected by STN suppression**

173 All GPe neurons with M1/SMA inputs exhibited movement-related activity during the PRE period  
174 and were thus classified as increasing (INC) type (46/79, 58%) or decreasing (DEC) type (33/79,  
175 42%) based on the polarity of the largest movement-related modulation. GPe neurons in each type  
176 are exemplified in Supplementary Figure 7a, b. The activity of GPe neurons was summarized as  
177 heat maps (Fig. 3a) and population peri-event time histograms (PETHs) (Fig. 3b). In the POST  
178 period, the firing rate decreased in both types of GPe neurons, but the temporal structure of the  
179 movement-related modulation was preserved, i.e., INC- and DEC-type neurons showed increased  
180 and decreased activity, respectively, during movements. Statistical analyses revealed that the onset  
181 timing of movement-related modulation was similar for each neuron type between the PRE and  
182 POST periods (Fig. 3c3; INC type, from  $33 \pm 21$  ms to  $29 \pm 19$  ms,  $P = 0.9$ ,  $n = 46$ ; DEC type, from  
183  $13 \pm 27$  ms to  $34 \pm 27$  ms,  $P = 0.1$ ,  $n = 33$ ; Wilcoxon signed rank test; mean  $\pm$  SEM). However, the  
184 following changes were observed in the POST period: 1) The baseline firing rate decreased (Fig.  
185 3c1; INC, from  $69.6 \pm 4.0$  Hz to  $59.5 \pm 4.1$  Hz,  $P < 0.001$ ; DEC, from  $86.0 \pm 5.2$  Hz to  $71.4 \pm 5.3$   
186 Hz,  $P < 0.001$ ); 2) The peak and trough amplitudes of the PETHs decreased (Fig. 3c2; peak

187 amplitude in INC, from  $66.7 \pm 4.2$  Hz to  $57.5 \pm 4.8$  Hz,  $P < 0.05$ ; trough amplitude in DEC, from  
188  $61.5 \pm 4.3$  Hz to  $52.4 \pm 4.7$  Hz,  $P < 0.01$ ); and 3) Movement-related modulation was prolonged (Fig.  
189 3c4; INC, from  $186 \pm 25$  ms to  $312 \pm 49$  ms,  $P < 0.01$ ; DEC, from  $238 \pm 34$  ms to  $318 \pm 47$  ms,  $P <$   
190  $0.05$ ).

191 Similarly, all GPi neurons with M1/SMA inputs exhibited movement-related activity in the PRE  
192 period and were classified as either INC type (32/78, 41%) or DEC type (46/78, 59%). GPi neurons  
193 in each type are exemplified in Supplementary Figure 7c, d. The activity of GPi neurons was also  
194 summarized as heat maps (Fig. 3d) and population PETHs (Fig. 3e). Movement-related activity was  
195 affected only weakly by STN suppression. Statistical analyses indicated that the following  
196 parameters did not change during the POST periods: 1) baseline firing rate (Fig. 3f1; INC, from  
197  $77.4 \pm 5.3$  Hz to  $75.4 \pm 6.1$  Hz,  $P = 0.4$ ,  $n = 32$ ; DEC, from  $88.4 \pm 4.0$  Hz to  $87.4 \pm 3.7$  Hz,  $P = 0.4$ ,  
198  $n = 46$ ); 2) PETH trough amplitude of DEC-type neurons (Fig. 3f2; from  $62.6 \pm 3.5$  Hz to  $62.6 \pm$   
199  $3.9$  Hz,  $P = 0.5$ ); 3) onset timing of movement-related modulations (Fig. 3f3; INC, from  $0 \pm 24$  ms  
200 to  $-5 \pm 23$  ms,  $P = 0.5$ ; DEC, from  $27 \pm 21$  ms to  $-13 \pm 19$  ms,  $P = 0.3$ ); and 4) duration of  
201 movement-related modulations in INC-type neurons (Fig. 3f4; from  $241 \pm 42$  ms to  $313 \pm 59$  ms,  $P$   
202  $= 0.3$ ). The following parameters were exceptional: 1) PETH peak amplitude of INC-type neurons  
203 (Fig. 3f2; from  $73.1 \pm 6.1$  Hz to  $60.0 \pm 6.4$  Hz,  $P < 0.01$ ); and 2) movement-related modulations in  
204 DEC-type neurons (Fig. 3f4; from  $198 \pm 21$  ms to  $235 \pm 27$  ms,  $P < 0.05$ ).

205 The same analyses were performed for STN neurons (Supplementary Fig. 8). All STN neurons  
206 with M1/SMA inputs exhibited movement-related activity in the PRE period and were classified as  
207 INC type (32/44, 73%) or DEC type (12/44, 27%). Both types exhibited significantly reduced

208 baseline firing rates, but movement-related activity was affected only weakly.

209 The above analyses with the PETH showed that the activity of GPe/GPi neurons was affected  
210 only weakly by STN suppression. Trial-averaging analyses such as PETHs may not be appropriate  
211 to explain trial-to-trial variability in task performance. Hence, the temporal structures of spike trains  
212 (e.g., bursts and pauses) were analyzed in detail.

213

### 214 **Spike train variability increased in STN and GPe/GPi neurons**

215 Figure 4a shows examples of bursts and pauses in STN/GPe/GPi neurons. In the POST period, the  
216 pauses (blue lines) tended to become more frequent and of longer duration both at rest and during  
217 movements in all three examples, and burst activity (red lines) became more frequent in GPe  
218 neurons. Statistical analyses at rest and during movements revealed that the pause probability  
219 increased in the STN/GPe/GPi during the POST period (Fig. 4b; STN, from  $18.5 \pm 2.9\%$  to  $23.6 \pm$   
220  $3.4\%$ ,  $P < 0.05$ ,  $n = 44$ ; GPe, from  $19.6 \pm 1.7\%$  to  $27.4 \pm 2.1\%$ ,  $P < 10^{-7}$ ,  $n = 79$ ; GPi, from  $7.7 \pm$   
221  $1.1\%$  to  $10.3 \pm 1.3\%$ ,  $P < 10^{-4}$ ,  $n = 78$ ; Wilcoxon signed rank test; mean  $\pm$  SEM), whereas the burst  
222 probability increased only in GPe neurons (from  $0.29 \pm 0.05\%$  to  $0.61 \pm 0.11\%$ ,  $P < 0.001$ ). The  
223 coefficient of variation of inter-spike intervals (CV of ISIs) increased in the STN/GPe/GPi during  
224 the POST period (Fig. 4b; STN, from  $1.03 \pm 0.06$  to  $1.25 \pm 0.06$ ,  $P < 10^{-4}$ ; GPe, from  $1.14 \pm 0.05$  to  
225  $1.50 \pm 0.07$ ,  $P < 10^{-12}$ ; GPi, from  $0.89 \pm 0.03$  to  $1.00 \pm 0.04$ ,  $P < 10^{-6}$ ). The sequential correlation  
226 (i.e., the correlation in spike count between two successive windows [window size, 20 ms]), which  
227 quantifies the temporal dependence of spikes<sup>35</sup>, increased in the STN/GPe/GPi during the POST  
228 period (Fig. 4b; STN, from  $0.055 \pm 0.031$  to  $0.114 \pm 0.029$ ,  $P < 10^{-4}$ ; GPe, from  $0.298 \pm 0.020$  to

229  $0.377 \pm 0.022$ ,  $P < 10^{-9}$ ,  $n = 79$ ; GPi, from  $0.169 \pm 0.016$  to  $0.224 \pm 0.015$ ,  $P < 10^{-6}$ ,  $n = 78$ ). The  
230 Fano factor, a measure of the variability in spike activity across trials, increased in the  
231 STN/GPe/GPi during the POST period (Fig. 4b; 100-ms bin size; STN, from  $1.19 \pm 0.10$  to  $1.52 \pm$   
232  $0.12$ ,  $P < 10^{-5}$ ; GPe, from  $1.63 \pm 0.09$  to  $2.22 \pm 0.13$ ,  $P < 10^{-11}$ ; GPi, from  $1.13 \pm 0.07$  to  $1.31 \pm 0.07$ ,  
233  $P < 10^{-4}$ ).

234 To investigate the neural mechanism that contributed to the Fano factor increase, its correlations  
235 with the firing rate and sequential correlation were examined (Fig. 4c). The changes in the Fano  
236 factor were negatively correlated with changes in the firing rate in the STN (Fig. 4c *upper*;  $R^2 =$   
237  $0.254$ ) but not in the GPe/GPi (GPe,  $R^2 = 0.141$ ; GPi,  $R^2 = 0.157$ ). In contrast, the changes in the  
238 Fano factor were positively correlated with changes in the sequential correlation in all three nuclei  
239 (Fig. 4c *lower*; STN,  $R^2 = 0.666$ ; GPe,  $R^2 = 0.578$ ; GPi,  $R^2 = 0.662$ ). The same analysis was applied  
240 to other statistical measures (Fig. 4d). In addition to the sequential correlation, changes in the CV of  
241 ISIs were positively correlated with Fano factor changes in all three nuclei. Interestingly, changes in  
242 the pause probability were positively correlated with Fano factor changes in the GPe/GPi but not  
243 the STN. The pauses in the GPe/GPi became more frequent and of longer duration both at rest and  
244 during movements in the POST period (Fig. 4e). These results suggest that STN suppression  
245 induces sporadic pauses and interrupted spike trains, resulting in highly irregular, unstable neural  
246 activity.

247

#### 248 **GPe/GPi spike variability is correlated with disturbance of reaching movements**

249 Although STN suppression increased spike train variability (Fig. 4) in the GPe/GPi, it is not clear

250 how these changes disturbed reaching movements. Detailed observations of spike trains and MTs  
251 (Fig. 5a) suggested that the firing rate of STN neurons tended to be lower in trials with long MTs in  
252 both the PRE and POST periods and that the Fano factor of GPe/GPi neurons tended to be higher in  
253 trials with long MTs. Thus, trials were grouped as short-MT trials (green, trials with MTs below the  
254 25<sup>th</sup> percentile) or long-MT trials (magenta, trials with MTs above the 75<sup>th</sup>). Population averaged  
255 PETHs revealed that the firing rate of the STN in the POST period from -300 to -200 ms from  
256 Movement onset was significantly lower in the long-MT trials, whereas no correlation between  
257 firing rate and MT was observed in the GPe/GPi (Fig. 5b). In contrast, population averaged Fano  
258 factors revealed that the Fano factor was higher in the long-MT trials during the POST period in the  
259 STN/GPe/GPi (Fig. 5c): at 0 ms from Movement onset in the STN, from 0 to 300 ms in the GPe,  
260 and from -100 to 100 ms in the GPi. Interestingly, the Fano factor tended to be higher in the  
261 long-MT trials during the PRE period as well, suggesting that STN suppression exaggerates spike  
262 train variability observed in the normal state.

263

### 264 **Involuntary movements correlated with phasic STN, GPe, and GPi activity**

265 The relationship between phasic activity changes in STN/GPe/GPi neurons and involuntary  
266 movements was examined in the POST period (Fig. 6). Among neurons with a sufficient number of  
267 trials (>20) with involuntary movements, STN (22/38, 58%), GPe (24/74, 32%), and GPi (18/50,  
268 36%) neurons exhibited significant firing rate modulations during the 200 ms preceding the onset of  
269 involuntary movements, as shown in Figure 6a (data shuffling method with  $\alpha = 0.05$ , two-tailed; see  
270 Online Methods). In the STN, DEC-type neurons tended to exhibit inhibition during involuntary

271 movements, and INC-type neurons tended to exhibit excitation (Fig. 6b; INC vs. DEC types,  $\chi^2 =$   
272 10.6,  $P < 0.005$ ; chi-square test). A similar tendency was observed in the GPe (although only  
273 marginally significant:  $\chi^2 = 3.3$ ,  $P = 0.07$ ) but not the GPi ( $\chi^2 = 1.16$ ,  $P = 0.3$ ). Both the excitation  
274 and inhibition preceded the onset of involuntary movements (Fig. 6c): excitation (STN,  $-138 \pm 100$   
275 ms; GPe,  $-105 \pm 100$  ms; GPi,  $-87 \pm 118$  ms; mean  $\pm$  SD) and inhibition (STN,  $-63 \pm 73$  ms; GPe,  
276  $-91 \pm 57$  ms; GPi,  $-73 \pm 69$  ms).

## 277 **Discussion**

278 Simplified neural networks with excitatory and inhibitory neurons can generate irregular spike  
279 patterns without external noise, either through fluctuations in synaptic inputs around the spike  
280 threshold<sup>36</sup> or through shifts in network states<sup>37,38</sup>. These models require interactions between  
281 excitatory and inhibitory neurons. The reciprocal connection between the STN and GPe is sufficient  
282 to generate irregular spiking patterns, which could be transferred to the GPi. One possible  
283 mechanism involves frequent shifts in STN-GPe network dynamics. With the reduced excitatory  
284 tone, the population activity can more easily shift from one network state to another. Such a  
285 frequent network transition would result in varying spike counts at the same task timings across  
286 trials, leading to an increase in the Fano factor. Neural mechanisms that modulate spike train  
287 variability via excitatory external inputs have been proposed; simulation studies showed that simple  
288 or correlated excitatory inputs to a neural network reduce spike variability<sup>37,39</sup>, which could explain  
289 the high spike variability in the GPe/GPi upon STN suppression. Although the exact neural  
290 mechanism is not clear, the STN-GPe reciprocal connection is suitable to control irregularities in  
291 spike trains.

292 Exaggerated pauses in the GPe can also contribute to development of spike variability (Fig. 4).  
293 The functional role of pauses in the GPe remains elusive, however. Many GPe neurons reportedly  
294 exhibit pauses in non-human primates<sup>33,40</sup> and humans<sup>41</sup>. Although pauses were not correlated with  
295 any movements, relationships with alertness, task engagement, and motor learning have been  
296 reported<sup>42-44</sup>. Hence, the probability of pauses depends upon the animal's state, while the timing of  
297 individual pauses does not have any physiologic significance. Loss of excitatory inputs from the



298 STN to the GPe dramatically enhanced pauses (Fig. 4e), consistent with pharmacologic studies<sup>8,34</sup>.  
299 Assuming that the GPe affects the GPi either directly or indirectly, the random and irregular nature  
300 of pauses in the GPe is sufficient to impart variability to spike trains in the GPi.

301 Abnormal involuntary movements induced by STN suppression occurred in a sporadic manner  
302 irrespective of task timing or type (Fig. 2d). Compared with hemiballism induced by lesions or  
303 complete blockade of the STN<sup>6-8</sup>, DREADD-induced involuntary movements exhibited a smaller  
304 amplitude and affected only a specific body part, presumably because suppression of STN activity  
305 was mild (65-75%) and affected only the forelimb motor subregion.

306 After STN suppression, spike variability increased in STN/GPe/GPi neurons (Fig. 4), some of  
307 which exhibited activity modulation preceding the onset of involuntary movements (Fig. 6). These  
308 results suggest that involuntary movements are induced via the following neural mechanism: 1) In  
309 the normal state, excitatory inputs from the STN stabilize GPe/GPi activity; 2) Loss of excitatory  
310 inputs from the STN increases pauses and spike variability in the GPe/GPi; and 3) Coincident  
311 pauses/spikes across neurons occur with an increased probability, leading to sporadic involuntary  
312 movements. Neural activity in the STN/GPe/GPi exhibited similar modulation (i.e., increase or  
313 decrease) between in involuntary movements and during the task (Fig. 6b), and such modulation  
314 well preceded the onset of involuntary movements (Fig. 6c). These observations suggest that  
315 involuntary movements are conveyed through the same cortico-BG pathway that regulates normal  
316 voluntary movements.

317 The STN is believed to increase the baseline firing rate of the GPi, enhancing inhibition on the  
318 thalamus. The role of the STN in regulating movement stopping or switching was initially

319 examined in DBS and imaging studies in humans<sup>20-22</sup>, and later supported by electrophysiologic  
320 recordings in rodents<sup>45</sup>. Further studies in non-human primates showed that the STN neurons  
321 involved in movement stopping or switching are restricted to the ventromedial STN<sup>46,47</sup>, the target  
322 of the dorsolateral prefrontal cortex or pre-supplementary motor area<sup>48,49</sup>. The present study focused  
323 primarily on the dorsolateral STN (Fig. 1b and Supplementary Fig. 1), the target of the M1 and  
324 SMA<sup>29,48,50</sup>. Together with the motor-related STN activity observed during the reaching task  
325 (Supplementary Fig. 8), the dorsolateral STN plays a role more closely related to the movement  
326 itself rather than movement stopping or switching.

327 Our across-trial analysis showed that long MT was associated with high spike variability at  
328 Movement onset after STN suppression in STN/GPe/GPi neurons, but no such trend was observed  
329 in terms of firing rate (Fig. 5). Interestingly, low STN firing rates preceded high spike variability in  
330 GPe/GPi neurons by 200-300 ms (Fig. 5b, c), supporting a role for the STN in maintaining stability  
331 in the BG circuitry. These results suggest a novel perspective on the STN function; Excitatory STN  
332 inputs stabilize spike timing in GPe/GPi neurons, reduce trial-to-trial variability during movements,  
333 and contribute to performance of rapid and stable movements. Loss of such excitatory inputs  
334 increases spike variability in GPe/GPi neurons and disturbs movements.

335 Loss of dopaminergic neurons in the substantia nigra pars compacta results in motor impairments  
336 in PD. The classical model predicts that diminished transmission via the *direct* pathway and  
337 enhanced transmission via the *indirect* pathway lead to increased GPi activity<sup>5</sup>; however, the  
338 baseline firing rate in the GPi does not necessarily increase<sup>9,51,52</sup>. Instead, the firing pattern changes  
339 dramatically in PD; spike trains of many GPe/GPi neurons exhibit correlated, oscillatory activity at

340 the  $\beta$  frequency<sup>53,54</sup>. Although the origin of these pathologic oscillations remains controversial, the  
341 STN-GPe reciprocal loop is reportedly crucial<sup>13,14</sup>. Both STN-DBS and STN suppression may  
342 antagonize these GPe/GPi activity changes observed in PD. Actually, both DBS and lesions of the  
343 STN exhibit therapeutic effects on PD symptoms<sup>15–17,55</sup>. High-frequency DBS inhibits STN activity,  
344 presumably by stimulating GABAergic presynaptic terminals<sup>56–58</sup>, activates STN axons and induces  
345 a regularized and phasic-locked firing pattern in GPe/GPi neurons, resulting in a reduction in  
346 information transmission among the BG nuclei<sup>58–61</sup>. Chemogenetic suppression of the STN  
347 increased pause frequency and duration and the sequential correlation in the STN/GPe/GPi (Fig. 4),  
348 indicating that the discharge rate of a neuron depends more on its previous state than the input to the  
349 neuron. Therefore, STN-DBS and STN lesions including chemogenetic suppression would have the  
350 same effect: a reduction in the transmission of information across the BG nuclei, which could  
351 prevent the spread of pathologic oscillatory activity within and/or outside the BG and thus have  
352 beneficial effects on PD symptoms.

## 353 **Online Methods**

### 354 **Experimental subjects**

355 Three Japanese monkeys (*Macaca fuscata*; E, male, 7.9 kg, 6 years old at the time of surgical  
356 operation; K, female, 6.7 kg, 7 years old; U, female, 5.1 kg, 4 years old) were used in this study.  
357 During behavioral experiments, access to drinking water was restricted to maintain body weight at  
358 90% of initial and then completely withheld for 24 h before experiments. The experimental  
359 protocols were approved by the Institutional Animal Care and Use Committee of the National  
360 Institutes of Natural Sciences. All experiments were conducted according to the guidelines of the  
361 National Institutes of Health *Guide for the Care and Use of Laboratory Animals*.

362

### 363 **Surgery**

364 Each monkey underwent surgical operation under aseptic conditions to fix its head painlessly in a  
365 stereotaxic frame, as previously described<sup>8,62</sup>. Under general anesthesia with ketamine  
366 hydrochloride (5-8 mg/kg body weight, i.m.), xylazine hydrochloride (0.5-1 mg/kg, i.m.), and  
367 propofol (5-7 µg/ml of target blood concentration, i.v.), the scalp was incised, the skull was widely  
368 exposed, and bolts made of polyether ether ketone (PEEK) or titanium were screwed into the skull  
369 as anchors. The skull was covered with bone adhesive resin (Super-Bond C&B, Sun Medical)  
370 followed by acrylic resin (Unifast II, GC Co). Two PEEK pipes were mounted in parallel over the  
371 frontal and occipital areas for head fixation. An antibiotic was injected (i.m.) after surgery.

372 After one week of recovery time, bipolar stimulating electrodes were chronically implanted to the  
373 motor cortices<sup>8,28,62</sup>. Under general anesthesia with ketamine hydrochloride (4-5 mg/kg, i.m.), the

374 skull over the forelimb regions of the M1 and SMA was removed. To access the STN vertically or  
375 the GPe/GPi obliquely, the skull on the trajectories was also removed. The forelimb regions of the  
376 M1 and SMA were physiologically identified<sup>8,62</sup>. Three pairs of bipolar stimulating electrodes  
377 (200- $\mu$ m stainless steel wires; 2-2.5 mm inter-electrode distance) were then implanted in the distal  
378 and proximal forelimb regions of the M1 and the forelimb region of the SMA and fixed with acrylic  
379 resin: two pairs to distal and proximal forelimb regions of the M1, and one pair to the forelimb  
380 region of the SMA. Rectangular plastic chambers were fixed to the skull with acrylic resin to access  
381 the STN and GPe/GPi. In monkey E, the stimulating electrode in the SMA became ineffective  
382 during experimental sessions, and only the stimulating electrodes in the M1 were used.

383

#### 384 **Preparation of AAV**

385 The transfer plasmid, pAAV-CAG-hM4D-2a-GFP (Fig. 1a), was prepared from  
386 pAAV-CAG::FLEX-rev::hM4D-2a-GFP, a gift from Scott Sternson (Addgene plasmid #52536)<sup>63</sup>.  
387 The DNA fragment encoding hM4D-2a-GFP was separated at two *EcoRI* sites and inserted into the  
388 original plasmid in the inverted orientation, followed by the excision of the FLEX (loxP and  
389 lox2272) sequence at *XbaI* and *SpeI* sites.

390 The AAV vector was prepared as previously described<sup>64</sup>. Briefly, the plasmid vector was  
391 packaged with AAV-DJ capsid using the AAV Helper Free Expression System (Cell Biolabs); the  
392 packaging plasmids (pAAV-DJ and pHelper) as well as the transfer plasmid were transfected into  
393 HEK293T cells, which were harvested 72 h later and lysed by repeated freezing and thawing. The  
394 crude cell extract containing AAV particles was purified by ultracentrifugation with cesium chloride

395 and concentrated by ultrafiltration using an Amicon 10K MWCO filter (Merck Millipore). The copy  
396 number of the viral genome (vg) was  $6.5-9.5 \times 10^{12}$  vg/ml, as determined using TaqMan Universal  
397 Master Mix II (Applied Biosystems).

398

### 399 **Mapping the STN**

400 Extracellular unit activity was recorded with glass-coated tungsten electrodes (1 M $\Omega$ , Alpha  
401 Omega) or handmade Elgiloy-alloy microelectrodes (0.5-1.5 M $\Omega$  at 1 kHz). A microelectrode was  
402 inserted vertically into the STN. Signals from the electrode were amplified, digitized at 44 kHz,  
403 digitally filtered between 0.5 and 9 kHz, and stored on a computer using a multi-channel recording  
404 system (AlphaLab SnR, Alpha Omega). A custom MATLAB script was used to manually isolate  
405 single-unit activity of the STN neurons. The STN was identified based on (1) mid-frequency (40  
406 Hz) firings, and (2) biphasic excitation to cortical stimulation (Fig. 1a; 0.3-ms duration; single  
407 pulse; intensity, 0.2 to 0.7 mA; inter-stimulus interval, 1.4 s) examined by constructing  
408 peri-stimulus time histograms (PSTHs) with 1-ms bins<sup>8,28,62</sup>.

409

### 410 **Injection of AAV**

411 To precisely target the motor subregion of the STN, neural activity was recorded using a  
412 micropipette with a wire electrode when exploring the AAV injection sites. A glass micropipette was  
413 made from a borosilicate glass capillary (inner diameter, i.d., 1.8 mm; outer diameter, o.d., 3 mm.;  
414 G-3, Narishige) using a puller (PE-2, Narishige) and a beveler (EG-3, Narishige) and connected to a  
415 25- $\mu$ l Hamilton microsyringe (Hamilton Company) by a joint Teflon tube (JT-10, Eicom). A

416 tungsten wire (30- $\mu$ m core diameter with Teflon insulation; California Fine Wire Co.) was inserted  
417 into the micropipette to record neuronal activity. The glass micropipette, tubing, and Hamilton  
418 microsyringe were filled with mineral oil (MOLH-100, Kitazato Co.). The syringe was  
419 mechanically controlled by a syringe pump (IMS-20, Narishige). Viral vector solution was loaded  
420 from the micropipette. The glass micropipette was inserted vertically into the motor subregion of  
421 the STN through a small incision in the dura mater based on the STN mapping. After confirming  
422 the motor subregion of the STN by responses to cortical stimulation, 1  $\mu$ l of the AAV solution was  
423 slowly infused at a rate of 0.05 nl/min. The micropipette was left in place for an additional 5 min  
424 and then slowly moved. To cover the motor subregion of the STN, multiple injections were  
425 performed (1  $\mu$ l per site, 1-2 sites per track, 1-2 tracks per day for 2-4 days); in total, 4, 15, and 21  
426  $\mu$ l were injected to the STN of monkeys E, K, and U, respectively.

427

## 428 **Reaching task**

429 Each monkey was trained to sit on the monkey chair and perform a custom reach-and-pull task, in  
430 which the monkey initiated the movements immediately after a ‘Go’ cue presentation (externally  
431 triggered reaching trials, or ET trials) or without an apparent Go cue (self-initiated reaching trials,  
432 or SI trials) (Fig. 2a). Task setup consisted of a home lever (2.5 cm in length, located 20 cm away  
433 and 25 cm below eye position), a full color LED (located at 25 cm away and 5 cm below), and a  
434 front lever (located at 22, 22, and 20 cm away for monkeys E, K, and U, respectively, and 7 cm  
435 below). First, the monkey sat on the monkey chair with its head fixed and pulled the home lever  
436 toward its body. After a random delay of 0.8-2.5 s, the LED turned on (Task cue) with a color

437 instructing the trial type (blue, ET trial; red, SI trial). In ET trials, the LED color changed from blue  
438 to green (Go cue) in 1-2 s; the monkey was required to release its hand from the home lever  
439 (Movement onset) within 0.5 s and pull the front lever (Lever pull) within 3 s. In SI trials, the  
440 monkey was required to wait for 1.5 s but no more than 5 s, release its hand from the home lever  
441 (Movement onset), and pull the front lever (Lever pull) within 3 s. The trials were considered  
442 successful only if both the home lever release and the front lever pull were performed within the  
443 correct time windows. With a delay of 0.5 s after the front lever pull, the LED turned off; in a  
444 successful trial, 0.2 ml of juice was delivered as a reward. The two types of trials were randomly  
445 presented with an equal probability of 45%. The remaining 10% of trials were the same as SI trials  
446 except that the red LED turned green at 1.5 s to instruct the monkey as to the correct timing of the  
447 movement initiation (Instruction trials). The positions of the home and front levers were monitored  
448 using magnets attached to the levers and Hall-effect sensors fixed on the lever housings. Analog  
449 outputs from the sensors were recorded at 2,750 Hz, down-sampled to 100 Hz, and converted to the  
450 lever positions.

451 RT was defined as the time from Go cue to Movement onset in ET trials and the time from Task  
452 cue to Movement onset in SI trials. MT was defined as the time from Movement onset to Lever pull.  
453 The behavioral task was controlled and logged using a custom script written in LabVIEW  
454 (LabVIEW 2013, National Instruments).

455 Stable performance was achieved in all monkeys after training for >3 months; the success rates  
456 were  $95.1 \pm 2.9$ ,  $88.7 \pm 10.1$ , and  $89.2 \pm 10.5\%$  in ET trials and  $82.1 \pm 10.1$ ,  $78.8 \pm 7.4$ , and  $91.6 \pm$   
457  $7.7\%$  in SI trials for monkeys E, K and U, respectively (mean  $\pm$  SD;  $n = 21$ ,  $28$ , and  $32$  for monkeys



458 E, K, and U, respectively). To avoid possible effects of DREADD ligands from the previous  
459 experiment, task sessions were performed every other day.

460

#### 461 **Administration of CNO or DCZ**

462 CNO (HY-17366, MedChem Express) and DCZ (HY-42110, MedChem Express) were dissolved in  
463 dimethyl sulfoxide (DMSO) and then diluted with 0.9% saline to a final concentration of 1 mg/ml  
464 in 5% DMSO solution. DCZ is a newly developed ligand with high *in vivo* stability and high  
465 blood-brain-barrier permeability<sup>32</sup>, without the potential off-target effects associated with CNO<sup>65</sup>.

466 Aliquots were frozen at  $-20^{\circ}\text{C}$  for <2 weeks until used. The amount of DREADD ligand was  
467 determined in a pilot study to induce abnormal movements and used throughout the experiments:  
468 CNO, 1.0 mg/kg body weight (i.v.) and DCZ, 0.1 mg/kg body weight (i.m.). The PRE period was  
469 defined as  $-15$  to  $0$  min relative to administration of DREADD ligand. The POST period was  
470 defined as  $20$  to  $45$  min for CNO administration and  $10$  to  $45$  min for DCZ administration based on  
471 observations of STN activity (Fig. 1c), reflecting more rapid onset of DCZ than CNO. As a control,  
472 the same volume of vehicle (5% DMSO in 0.9% saline) was administered (i.v. in monkey E; i.m. in  
473 monkeys K and U).

474

#### 475 **Behavioral observations**

476 To reconstruct 3D trajectories for arm joints, RGB (x-y) and depth (z) images of the upper limb of  
477 the monkey during task performance were captured at 30 Hz using a depth camera (RealSense<sup>TM</sup>  
478 D435, Intel) and stored on a computer. To detect the positions of the arm joints, RGB (x-y) images

479 were processed using DeepLabCut, as described previously<sup>66,67</sup>, using a computer (Ubuntu 18.04,  
480 Intel Core i7-8750H and GeForce GTX 1050Ti). Training data were prepared by manually labeling  
481 the shoulder, elbow, wrist, and hand of 160 images from 4 task sessions, and the neural network was  
482 trained for 200,000 iterations. After determining the positions of the joints using a RGB (x-y) image,  
483 the distance from the camera to each joint was calculated as the average depth close to the  
484 corresponding position ( $\leq 10$  pixels) in the depth image. Lastly, time series of 3D trajectories were  
485 constructed and digitally low-pass filtered (4th-order Butterworth, 7.5 Hz) before analysis.  
486 Trajectory deviation was defined as the total deviation from the mean trajectory; tortuosity was  
487 defined as the trajectory length divided by the end-point distance; and travel distance was defined as  
488 the total trajectory length. Speed of the joints was calculated from the displacement between two  
489 consecutive frames (1/30 s).

490

#### 491 **Recording of STN, GPe, and GPi activity**

492 The motor subregion in the GPe/GPi receiving input from the M1 and SMA was roughly mapped  
493 with extracellular unit recordings using the similar electrode for the STN mapping. The electrode  
494 was obliquely ( $40^\circ$  from vertical in the front plane) inserted, and spontaneous firing activity and  
495 cortically evoked responses were recorded. The GPe/GPi were identified based on 1)  
496 high-frequency ( $>60$  Hz) firings, and 2) an excitation-inhibition-excitation triphasic response to  
497 cortical stimulation (the same parameters as those used for STN mapping<sup>8,28,62</sup>). The GPe and GPi  
498 were distinguished by 1) the GPe-GPi boundary with low-frequency firings, presumably the medial  
499 medullary lamina; and 2) firing patterns: pauses observed in HFD-P GPe neurons but rarely seen in

500 HFD GPi neurons<sup>33,40</sup>.

501 Extracellular unit activity during task performance was recorded using 16-channel linear  
502 electrodes (0.8-2.0 M $\Omega$  at 1 kHz; inter-electrode distance, 100 or 150  $\mu$ m; Plexon). The  
503 multichannel electrode was inserted through a stainless guide tube (i.d., 0.45 mm; o.d., 0.57 mm)  
504 vertically into the STN or obliquely (40° from vertical) into the GPe/GPi. Signals from the  
505 electrodes were amplified, digitized at 44 kHz, digitally filtered between 0.5 and 9 kHz, and stored  
506 on a computer using a multi-channel recording system (AlphaLab SnR, Alpha Omega). In a total of  
507 78 recording sessions, 1 to 5 well-isolated units ( $2.54 \pm 1.11$ ; mean  $\pm$  SD) were simultaneously  
508 recorded. A custom MATLAB script was used to manually isolate single-unit activity of  
509 STN/GPe/GPi neurons. Cortically evoked responses (the same parameters as those used for  
510 STN/GPe/GPi mapping) of STN/GPe/GPi neurons were examined by constructing PSTHs with  
511 1-ms bins, and neurons with cortical inputs were analyzed. Cortical stimulation was performed  
512 every 5 or 10 min during the reaching task to examine the effect of the DREADD ligand  
513 (Supplementary Fig. 6). Electrophysiologic data obtained during cortical stimulation were excluded  
514 in analyses of baseline and movement-related activity.

515

### 516 **EMG recording**

517 EMGs of the biceps and triceps brachii muscles were obtained using surface electrodes (NE-05,  
518 Nihon Kohden) for monkey K or chronically implanted stainless wire electrodes (7-stranded  
519 25.4- $\mu$ m diameter wire with Teflon coating; A-M Systems, Sequim, WA, USA) for monkey U.  
520 Signals from the electrodes were amplified (5000 $\times$ ) and bandpass-filtered (150-3000 Hz) using an

521 amplifier (MEG-5200, Nihon Kohden), digitized at 20 kHz (PCIe-6321, National Instruments), and  
522 stored on a computer. The root mean square (RMS) of each EMG was calculated with a 100-ms  
523 moving window. The RMS of the EMG was aligned with task events, and the mean and SEM were  
524 computed (Supplementary Fig. 4).

525

## 526 **Histology**

527 Monkeys E and K were sacrificed 58 and 89 weeks after AAV injection to examine viral  
528 transduction and confirm the sites of electrophysiologic recordings. Monkey U is still alive and  
529 used for further experiments. At the end of the experiments, electrolytic lesions were made with  
530 cathodal constant current (20  $\mu$ A for 30 s) at the putative boundaries of the GPe/GPi. With an  
531 overdose of sodium pentobarbital (50 mg/kg, i.v.), the monkeys were perfused transcardially with  
532 0.1 M phosphate buffer (PB) containing 4% formaldehyde. The brains were removed, kept in 0.1 M  
533 PB containing 30% sucrose at 4°C for cryoprotection, and serially cut with a freezing, sliding  
534 microtome (HM440E, Microm Co.) to obtain 50- $\mu$ m-thick frontal brain sections.

535 For double immunofluorescence staining, free-floating sections containing the STN were  
536 incubated with rabbit anti-GFP (1:1000; A11122, Invitrogen) and mouse anti-NeuN (1:1000;  
537 MAB377, Millipore) primary antibodies overnight at 4°C. The sections were then rinsed and  
538 incubated with Alexa Fluor 488–conjugated goat anti-rabbit (1:500; A11043, Invitrogen) and Alexa  
539 Fluor 594–conjugated goat anti-mouse (1:500; A11032, Invitrogen) antibodies for 1 h at room  
540 temperature. Similarly, free-floating sections containing the GPe/GPi were stained with mouse  
541 anti-NeuN primary antibody and Alexa Fluor 594–conjugated anti-mouse secondary antibody. The

542 sections were mounted on a gelatin-coated slide glass with FluorSave reagent (Calbiochem).

543 Fluorescence images were taken on an inverted microscope (BZ-X700, Keyence) with a 10×

544 objective.

545

## 546 **Data analysis**

547 All data were analyzed using custom scripts written in MATLAB (MATLAB R2019b, MathWorks).

548 Only successful trials were analyzed, except for the reaction and movement times shown in Figure

549 2b. Single-unit recordings from the STN/GPe/GPi were qualitatively similar in the three monkeys;

550 thus, the datasets from all monkeys were combined for the electrophysiologic analysis.

551

## 552 **Neuronal responses to cortical stimulation**

553 To examine the effect of STN suppression, cortically evoked responses in STN/GPe/GPi neurons

554 were analyzed (Supplementary Fig. 6). First, PSTHs with 1-ms bins were constructed for each

555 neuron; the PSTHs were smoothed with a Gaussian distribution ( $\sigma = 1.6$  ms) and transformed to

556 z-scores with activity from the 100 ms preceding cortical stimulation. For GPe/GPi neurons, early

557 excitation, inhibition, and late excitation were defined as 3 to 200 ms after stimulation, whereas

558 only early and late excitations were defined for STN neurons. Two consecutive bins with  $z > 1.65$

559 or  $z < -1.65$  were considered the onset of excitation and onset of inhibition, respectively. The

560 latency of the response was defined as the time from stimulation to onset, and duration was defined

561 as the period from onset until the first bin, followed by two consecutive bins within the threshold

562 ( $|z| \leq 1.65$ ). The amplitude was defined as the sum of the  $|z|$  scores during each response. Early and

563 late excitation was defined as excitation with latencies of  $<20$  ms and  $\geq 20$  ms, respectively.

564

### 565 **Movement-related neuronal activity**

566 Raster plots were constructed by aligning spikes at each task event, usually Movement onset

567 (Supplementary Fig. 7), and displayed chronologically before and after DREADD ligand

568 administration. PETHs were constructed by averaging firing rate across trials in 10-ms bins in the

569 PRE period (during the 15 min before DREADD ligand administration) and POST period (20-45

570 min after CNO administration or 10-45 min after DCZ administration). The spike activity during

571 the 500 ms before the Task cue presentation was used to calculate the baseline firing rate.

572 Modulation onset was defined as the time first exceeding a threshold of the mean  $\pm 1.96$  SD of the

573 baseline firing rate, and modulation duration was defined as the time from onset until the last bin

574 exceeding the threshold. The amplitudes of peaks and troughs were defined as the difference in

575 peak and trough firing rate from the baseline firing rate, respectively. If more than one peak and/or

576 trough was detected, the modulation having the largest area exceeding the threshold was used for

577 the statistical analysis and classification of response type (i.e., INC or DEC type). Heat maps and

578 population PETHs were constructed by calculating z-scores of PETHs using the firing activity

579 during  $-500$  to  $-300$  ms relative to Movement onset in the PRE period as the baseline.

580

### 581 **Firing patterns**

582 Bursts and pauses were detected using the Robust Gaussian Surprise method<sup>68</sup>. Briefly, the ISIs of a

583 spike train were log-transformed to give  $\log(\text{ISI})$ s. First, the central distribution of  $\log(\text{ISI})$ s was

584 calculated by excluding outliers, that is, bursts and pauses. The E-center was defined as the  
585 midpoint of the 5th and 95th percentiles of the  $\log(\text{ISI})$ s. The central set was defined as the  $\log(\text{ISI})$ s  
586 that fell within  $E\text{-center} \pm 1.64 \times \text{MAD}$ , where MAD is the median absolute deviation of  $\log(\text{ISI})$ s.  
587 The C1-center was defined as the median of the central set. The Central Location ( $\mu$ ) was the  
588 median of the  $\log(\text{ISI})$ s that fell within  $C1\text{-center} \pm 1.64 \times \text{MAD}$ . Then, normalized  $\log(\text{ISI})$ s  
589 (NLISIs) were defined as:  $NLISI_i = \log(\text{ISI}_i) - \mu$ . The distribution of NLISIs was assumed to be  
590 Gaussian, with  $\sigma = 1.48 \times \text{MAD}$ , and the P-value for each ISI was computed. ISIs below or above a  
591 statistical significance level ( $P < 10^{-5}$ ) were defined as bursts and pauses, respectively. Bursts and  
592 pauses were extended to adjacent ISIs if their inclusion lowered the P-value.

593 To analyze the spike train variability in Figure 4, the following parameters were calculated from  
594  $-1$  to  $1$  s relative to Movement onset in both the ET and SI trials: firing rate, burst and pause  
595 probabilities (probabilities of a neuron being in bursts and pauses, respectively), pause rate  
596 (frequency of pause occurrence), pause duration (average durations of all pauses), CV of ISIs  
597 (standard deviation divided by the mean of the ISIs), sequential correlation (correlation of spike  
598 count between successive time windows in each trial), and the Fano factor (variance divided by the  
599 mean number of spikes in a 100-ms window).

600

## 601 **Involuntary movements**

602 Involuntary movements of the upper limb were detected as the task-irrelevant movements of the  
603 home lever from  $-0.5$  to  $1$  s relative to Task cue. In the POST period, the home lever position  
604 exceeding the mean  $\pm 3\text{SD}$  calculated from the same duration in the PRE period was considered to

605 be caused by involuntary movements. The onset and end of involuntary movements were defined as  
606 the first and last points exceeding the mean  $\pm$  3SD, respectively. The home lever position from  $-0.5$   
607 to 1.0 s from Task cue was used to calculate the occurrence probability (Fig. 2d, e), and that from  
608 0.1 to 1.5 s before Movement onset was used to analyze neural activity (Fig. 6).

609 To analyze spike activity during the involuntary movements shown in Figure 6, PETHs during  
610  $\pm 500$  ms from the onset of involuntary movements were constructed with 5-ms bins and 40-ms  
611 averaging windows. Involuntary movements were observed at various task timings (Fig. 2d); the  
612 movement-related activity around Movement onset would affect the PETH. To exclude the effect of  
613 movement-related activity, shuffled PETHs were constructed from trials without any involuntary  
614 movements and compared with the original PETH. To construct a shuffled PETH, each trial in the  
615 original PETH was replaced with a 1-s segment of spike train without involuntary movements at the  
616 same timing relative to Movement onset. This process was repeated 1000 times to obtain 1000  
617 shuffled PETHs. At each bin, the spike counts of the 1000 shuffled PETHs were sorted from the  
618 lowest to the highest. The confidence interval was defined as the spike count from the 25<sup>th</sup> to the  
619 976<sup>th</sup> at each bin, corresponding to a significance level of 0.05. Neural activity was judged to be  
620 modulated if the total spike count during the 200 ms preceding the onset of involuntary movements  
621 was below the 25<sup>th</sup> (inhibition) or above the 976<sup>th</sup> (excitation) of the corresponding spike counts in  
622 the shuffled PETHs. Onset of activity modulation was defined as the beginning of  $\geq 10$  bins ( $\geq 50$   
623 ms) exceeding the confidence interval during  $\pm 500$  ms from the onset of involuntary movements.

624

625 **Statistics**



626 The success rate, RT, and MT, as well as the occurrence probability of involuntary movements,  
627 were calculated in each session, and the statistical significance was computed using the two-tailed  
628 Wilcoxon signed rank test between the PRE and POST periods (Fig. 2b, e). In the trajectory  
629 analysis, trials from 2-3 sessions were combined; trajectory deviation, tortuosity, and maximum  
630 speed were calculated in each trial and compared between the PRE and POST periods using the  
631 two-tailed Mann-Whitney  $U$  test (Fig. 2c).

632 The significance of decreases in STN activity was computed using the one-tailed Wilcoxon  
633 signed rank test with Bonferroni correction (Fig. 1c). To determine the significance of changes in  
634 the PETHs (Fig. 3c, f and Supplementary Fig. 8e), firing patterns (Fig. 4b, e), and neuronal  
635 responses to cortical stimulation (Supplementary Fig. 6c), the parameters of individual neurons  
636 were compared between the PRE and POST periods using the two-tailed Wilcoxon signed rank test.  
637 The statistical significance of differences in spike properties between the long- and short-MT trials  
638 was computed using the two-tailed Wilcoxon signed rank test with Bonferroni correction (Fig. 5).

639

#### 640 **Data availability**

641 The data that support the findings of this study are available from the corresponding author upon  
642 reasonable request.

643

#### 644 **Code availability**

645 The code to generate the results and the figures of this study are available from the corresponding  
646 authors upon reasonable request.

647 **Acknowledgments**

648 We thank S. Sato, H. Isogai, N. Suzuki, K. Awamura, K. Miyamoto, T. Sugiyama, and R.  
649 Kageyama for technical support; and Y. Yamagata for her critical reading of the manuscript. This  
650 work was supported by MEXT KAKENHI (“Non-linear Neurooscillology”, 15H05873 to A.N.),  
651 JSPS KAKENHI (19KK0193 to A.N., 16K07014 to S.C., JP18K15340 to T.H.), JST CREST  
652 (JPMJCR1853 to S.C.), AMED (JP20dm0307005 and JP20dm0207050 to A.N.), and Takeda  
653 Science Foundation (to T.H.) grants. Japanese monkeys used in the present study were obtained  
654 through the National Bio-Resource Project (NBRP) “Japanese Monkeys” of AMED.

655

656 **Author Contributions**

657 T.H., S.C., and A.N. designed the study; K.K. generated the viral vector; T.H. and S.C. performed  
658 the experiments; T.H. analyzed the data; T.H., S.C., and A.N. wrote the manuscript.

659

660 **Competing Interests statement**

661 The authors declare no competing interests.

## 662 **References**

- 663 1. Polyakova, Z., Chiken, S., Hatanaka, N. & Nambu, A. Cortical control of subthalamic neuronal  
664 activity through the hyperdirect and indirect pathways in monkeys. *J. Neurosci.* **40**, 7451–7463  
665 (2020).
- 666 2. Fujiyama, F. *et al.* A single-neuron tracing study of arkypallidal and prototypic neurons in  
667 healthy rats. *Brain Struct. Funct.* **221**, 4733–4740 (2016).
- 668 3. Mallet, N. *et al.* Dichotomous organization of the external globus pallidus. *Neuron* **74**, 1075–  
669 1086 (2012).
- 670 4. Albin, R. L., Young, A. B. & Penney, J. B. The functional anatomy of basal ganglia disorders.  
671 *Trends Neurosci.* **12**, 366–375 (1989).
- 672 5. DeLong, M. R. Primate models of movement disorders of basal ganglia origin. *Trends Neurosci.*  
673 **13**, 281–285 (1990).
- 674 6. Carpenter, M. B., Whittier, J. R. & Mettler, F. A. Analysis of choreoid hyperkinesia in the  
675 Rhesus monkey; surgical and pharmacological analysis of hyperkinesia resulting from lesions  
676 in the subthalamic nucleus of Luys. *J. Comp. Neurol.* **92**, 293–331 (1950).
- 677 7. Hamada, I. & DeLong, M. R. Excitotoxic acid lesions of the primate subthalamic nucleus result  
678 in transient dyskinesias of the contralateral limbs. *J. Neurophysiol.* **68**, 1850–1858 (1992).
- 679 8. Nambu, A. *et al.* Excitatory cortical inputs to pallidal neurons via the subthalamic nucleus in  
680 the monkey. *J. Neurophysiol.* **84**, 289–300 (2000).
- 681 9. Bergman, H., Wichmann, T., Karmon, B. & DeLong, M. R. The primate subthalamic nucleus. II.  
682 Neuronal activity in the MPTP model of parkinsonism. *J. Neurophysiol.* **72**, 507–520 (1994).

- 683 10. Deffains, M. *et al.* Subthalamic, not striatal, activity correlates with basal ganglia downstream  
684 activity in normal and parkinsonian monkeys. *Elife* **5**, (2016).
- 685 11. Moran, A., Bergman, H., Israel, Z. & Bar-Gad, I. Subthalamic nucleus functional organization  
686 revealed by parkinsonian neuronal oscillations and synchrony. *Brain* **131**, 3395–3409 (2008).
- 687 12. Leblois, A. *et al.* Late emergence of synchronized oscillatory activity in the pallidum during  
688 progressive parkinsonism. *Eur. J. Neurosci.* **26**, 1701–1713 (2007).
- 689 13. Plenz, D. & Kital, S. T. A basal ganglia pacemaker formed by the subthalamic nucleus and  
690 external globus pallidus. *Nature* **400**, 677–682 (1999).
- 691 14. Tachibana, Y., Iwamuro, H., Kita, H., Takada, M. & Nambu, A. Subthalamo-pallidal  
692 interactions underlying parkinsonian neuronal oscillations in the primate basal ganglia. *Eur. J.*  
693 *Neurosci.* **34**, 1470–1484 (2011).
- 694 15. Bergman, H., Wichmann, T. & DeLong, M. R. Reversal of experimental parkinsonism by lesions  
695 of the subthalamic nucleus. *Science* **249**, 1436–1438 (1990).
- 696 16. Guridi, J. *et al.* Subthalamotomy in parkinsonian monkeys. Behavioural and biochemical  
697 analysis. *Brain* **119**, 1717–1727 (1996).
- 698 17. Limousin, P. *et al.* Bilateral subthalamic nucleus stimulation for severe Parkinson’s disease.  
699 *Mov. Disord.* **10**, 672–674 (1995).
- 700 18. Mink, J. W. The basal ganglia: focused selection and inhibition of competing motor programs.  
701 *Prog. Neurobiol.* **50**, 381–425 (1996).
- 702 19. Nambu, A., Tokuno, H. & Takada, M. Functional significance of the cortico–subthalamo–  
703 pallidal ‘hyperdirect’ pathway. *Neurosci. Res.* **43**, 111–117 (2002).

- 704 20. Aron, A. R. & Poldrack, R. A. Cortical and subcortical contributions to Stop signal response  
705 inhibition: role of the subthalamic nucleus. *J. Neurosci.* **26**, 2424–2433 (2006).
- 706 21. Kühn, A. A. *et al.* Event-related beta desynchronization in human subthalamic nucleus  
707 correlates with motor performance. *Brain* **127**, 735–746 (2004).
- 708 22. van den Wildenberg, W. P. M. *et al.* Stimulation of the subthalamic region facilitates the  
709 selection and inhibition of motor responses in Parkinson’s disease. *J. Cogn. Neurosci.* **18**, 626–  
710 636 (2006).
- 711 23. Matsumura, M., Kojima, J., Gardiner, T. W. & Hikosaka, O. Visual and oculomotor functions of  
712 monkey subthalamic nucleus. *J. Neurophysiol.* **67**, 1615–1632 (1992).
- 713 24. Wichmann, T., Bergman, H. & DeLong, M. R. The primate subthalamic nucleus. I. Functional  
714 properties in intact animals. *J. Neurophysiol.* **72**, 494–506 (1994).
- 715 25. Hikosaka, O., Takikawa, Y. & Kawagoe, R. Role of the basal ganglia in the control of purposive  
716 saccadic eye movements. *Physiol. Rev.* **80**, 953–978 (2000).
- 717 26. Crossman, A. R., Sambrook, M. A. & Jackson, A. Experimental hemichorea/hemiballismus in  
718 the monkey. Studies on the intracerebral site of action in a drug-induced dyskinesia. *Brain* **107**,  
719 579–596 (1984).
- 720 27. Périer, C., Tremblay, L., Féger, J. & Hirsch, E. C. Behavioral consequences of bicuculline  
721 injection in the subthalamic nucleus and the zona incerta in rat. *J. Neurosci.* **22**, 8711–8719  
722 (2002).
- 723 28. Iwamuro, H., Tachibana, Y., Ugawa, Y., Saito, N. & Nambu, A. Information processing from the  
724 motor cortices to the subthalamic nucleus and globus pallidus and their somatotopic

- 725 organizations revealed electrophysiologically in monkeys. *Eur. J. Neurosci.* **46**, 2684–2701  
726 (2017).
- 727 29. Nambu, A., Takada, M., Inase, M. & Tokuno, H. Dual somatotopical representations in the  
728 primate subthalamic nucleus: evidence for ordered but reversed body-map transformations  
729 from the primary motor cortex and the supplementary motor area. *J. Neurosci.* **16**, 2671–2683  
730 (1996).
- 731 30. DeLong, M. R., Crutcher, M. D. & Georgopoulos, A. P. Primate globus pallidus and subthalamic  
732 nucleus: functional organization. *J. Neurophysiol.* **53**, 530–543 (1985).
- 733 31. Monakow, K. H., Akert, K. & Künzle, H. Projections of the precentral motor cortex and other  
734 cortical areas of the frontal lobe to the subthalamic nucleus in the monkey. *Exp. Brain Res.* **33**,  
735 395–403 (1978).
- 736 32. Nagai, Y. *et al.* Deschloroclozapine, a potent and selective chemogenetic actuator enables rapid  
737 neuronal and behavioral modulations in mice and monkeys. *Nat. Neurosci.* **23**, 1157–1167  
738 (2020).
- 739 33. DeLong, M. R. Activity of pallidal neurons during movement. *J. Neurophysiol.* **34**, 414–427  
740 (1971).
- 741 34. Kita, H., Nambu, A., Kaneda, K., Tachibana, Y. & Takada, M. Role of ionotropic glutamatergic  
742 and GABAergic inputs on the firing activity of neurons in the external pallidum in awake  
743 monkeys. *J. Neurophysiol.* **92**, 3069–3084 (2004).
- 744 35. Oram, M. W., Hatsopoulos, N. G., Richmond, B. J. & Donoghue, J. P. Excess synchrony in motor  
745 cortical neurons provides redundant direction information with that from coarse temporal

- 746       measures. *J. Neurophysiol.* **86**, 1700–1716 (2001).
- 747   36. van Vreeswijk, C. & Sompolinsky, H. Chaos in neuronal networks with balanced excitatory and  
748       inhibitory activity. *Science* **274**, 1724–1726 (1996).
- 749   37. Deco, G. & Hugues, E. Neural network mechanisms underlying stimulus driven variability  
750       reduction. *PLoS Comput. Biol.* **8**, e1002395 (2012).
- 751   38. Litwin-Kumar, A. & Doiron, B. Slow dynamics and high variability in balanced cortical  
752       networks with clustered connections. *Nat. Neurosci.* **15**, 1498–1505 (2012).
- 753   39. Bujan, A. F., Aertsen, A. & Kumar, A. Role of input correlations in shaping the variability and  
754       noise correlations of evoked activity in the neocortex. *J. Neurosci.* **35**, 8611–8625 (2015).
- 755   40. Elias, S. *et al.* Statistical properties of pauses of the high-frequency discharge neurons in the  
756       external segment of the globus pallidus. *J. Neurosci.* **27**, 2525–2538 (2007).
- 757   41. Sani, S., Ostrem, J. L., Shimamoto, S., Levesque, N. & Starr, P. A. Single unit “pauser”  
758       characteristics of the globus pallidus pars externa distinguish primary dystonia from secondary  
759       dystonia and Parkinson’s disease. *Exp. Neurol.* **216**, 295–299 (2009).
- 760   42. Adler, A. *et al.* Neurons in both pallidal segments change their firing properties similarly prior  
761       to closure of the eyes. *J. Neurophysiol.* **103**, 346–359 (2010).
- 762   43. Noblejas, M. I. *et al.* Hold your pauses: external globus pallidus neurons respond to behavioural  
763       events by decreasing pause activity. *Eur. J. Neurosci.* **42**, 2415–2425 (2015).
- 764   44. Schechtman, E., Noblejas, M. I., Mizrahi, A. D., Dauber, O. & Bergman, H. Pallidal spiking  
765       activity reflects learning dynamics and predicts performance. *PNAS* **113**, E6281–E6289 (2016).
- 766   45. Schmidt, R., Leventhal, D. K., Mallet, N., Chen, F. & Berke, J. D. Canceling actions involves a

- 767 race between basal ganglia pathways. *Nat. Neurosci.* **16**, 1118–1124 (2013).
- 768 46. Isoda, M. & Hikosaka, O. Role for subthalamic nucleus neurons in switching from automatic to  
769 controlled eye movement. *J. Neurosci.* **28**, 7209–7218 (2008).
- 770 47. Pasquereau, B. & Turner, R. S. A selective role for ventromedial subthalamic nucleus in  
771 inhibitory control. *Elife* **6**, e31627 (2017).
- 772 48. Haynes, W. I. A. & Haber, S. N. The organization of prefrontal-subthalamic inputs in primates  
773 provides an anatomical substrate for both functional specificity and integration: implications  
774 for Basal Ganglia models and deep brain stimulation. *J. Neurosci.* **33**, 4804–4814 (2013).
- 775 49. Inase, M., Tokuno, H., Nambu, A., Akazawa, T. & Takada, M. Corticostriatal and  
776 corticosubthalamic input zones from the presupplementary motor area in the macaque monkey:  
777 comparison with the input zones from the supplementary motor area. *Brain Res.* **833**, 191–201  
778 (1999).
- 779 50. Inase, M., Sakai, S. T. & Tanji, J. Overlapping corticostriatal projections from the  
780 supplementary motor area and the primary motor cortex in the macaque monkey: An  
781 anterograde double labeling study. *J. Comp. Neurol.* **373**, 283–296 (1996).
- 782 51. Kita, H. & Kita, T. Cortical stimulation evokes abnormal responses in the dopamine-depleted  
783 rat basal ganglia. *J. Neurosci.* **31**, 10311–10322 (2011).
- 784 52. Raz, A., Vaadia, E. & Bergman, H. Firing patterns and correlations of spontaneous discharge of  
785 pallidal neurons in the normal and the tremulous 1-methyl-4-phenyl-1,2,3,6-tetrahydropyridine  
786 vervet model of parkinsonism. *J. Neurosci.* **20**, 8559–8571 (2000).
- 787 53. Bergman, H. *et al.* Physiological aspects of information processing in the basal ganglia of



- 788 normal and parkinsonian primates. *Trends Neurosci.* **21**, 32–38 (1998).
- 789 54. Nini, A., Feingold, A., Slovin, H. & Bergman, H. Neurons in the globus pallidus do not show  
790 correlated activity in the normal monkey, but phase-locked oscillations appear in the MPTP  
791 model of parkinsonism. *J. Neurosci.* **74**, 1800–1805 (1995).
- 792 55. Wichmann, T., Bergman, H. & DeLong, M. R. The primate subthalamic nucleus. III. Changes in  
793 motor behavior and neuronal activity in the internal pallidum induced by subthalamic  
794 inactivation in the MPTP model of parkinsonism. *J. Neurophysiol.* **72**, 521–530 (1994).
- 795 56. Benazzouz, A. *et al.* Effect of high-frequency stimulation of the subthalamic nucleus on the  
796 neuronal activities of the substantia nigra pars reticulata and ventrolateral nucleus of the  
797 thalamus in the rat. *Neuroscience* **99**, 289–295 (2000).
- 798 57. Meissner, W. *et al.* Subthalamic high frequency stimulation resets subthalamic firing and  
799 reduces abnormal oscillations. *Brain* **128**, 2372–2382 (2005).
- 800 58. Moran, A., Stein, E., Tischler, H., Belevsky, K. & Bar-Gad, I. Dynamic stereotypic responses of  
801 Basal Ganglia neurons to subthalamic nucleus high-frequency stimulation in the parkinsonian  
802 primate. *Front. Syst. Neurosci.* **5**, 21 (2011).
- 803 59. Dorval, A. D. & Grill, W. M. Deep brain stimulation of the subthalamic nucleus reestablishes  
804 neuronal information transmission in the 6-OHDA rat model of parkinsonism. *J. Neurophysiol.*  
805 **111**, 1949–1959 (2014).
- 806 60. Dorval, A. D. *et al.* Deep brain stimulation reduces neuronal entropy in the MPTP-primate  
807 model of Parkinson’s disease. *J. Neurophysiol.* **100**, 2807–2818 (2008).
- 808 61. Hashimoto, T., Elder, C. M., Okun, M. S., Patrick, S. K. & Vitek, J. L. Stimulation of the

- 809 subthalamic nucleus changes the firing pattern of pallidal neurons. *J. Neurosci.* **23**, 1916–1923  
810 (2003).
- 811 62. Nambu, A., Kaneda, K., Tokuno, H. & Takada, M. Organization of corticostriatal motor inputs  
812 in monkey putamen. *J. Neurophysiol.* **88**, 1830–1842 (2002).
- 813 63. Atasoy, D., Betley, J. N., Su, H. H. & Sternson, S. M. Deconstruction of a neural circuit for  
814 hunger. *Nature* **488**, 172–177 (2012).
- 815 64. Sano, H., Kobayashi, K., Yoshioka, N., Takebayashi, H. & Nambu, A. Retrograde gene transfer  
816 into neural pathways mediated by adeno-associated virus (AAV)-AAV receptor interaction. *J.*  
817 *Neurosci. Methods* **345**, 108887 (2020).
- 818 65. Gomez, J. L. *et al.* Chemogenetics revealed: DREADD occupancy and activation via converted  
819 clozapine. *Science* **357**, 503–507 (2017).
- 820 66. Mathis, A. *et al.* DeepLabCut: markerless pose estimation of user-defined body parts with deep  
821 learning. *Nat. Neurosci.* **21**, 1281–1289 (2018).
- 822 67. Nath, T. *et al.* Using DeepLabCut for 3D markerless pose estimation across species and  
823 behaviors. *Nat. Protoc.* **14**, 2152–2176 (2019).
- 824 68. Ko, D., Wilson, C. J., Lobb, C. J. & Paladini, C. A. Detection of bursts and pauses in spike trains.  
825 *J. Neurosci. Methods* **211**, 145–158 (2012).

826

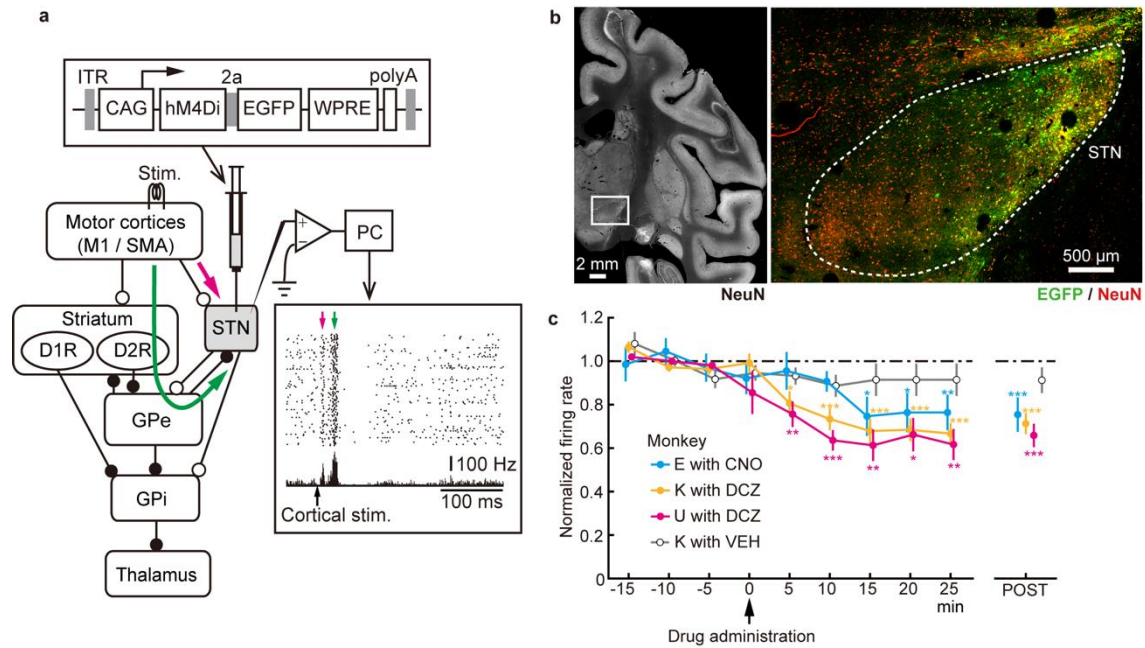

827  
828 **Fig. 1 | Suppression of STN activity using DREADD.** **a**, Experimental overview. The motor  
829 subregion of the STN was identified by the characteristic biphasic excitation (bottom right inset)  
830 induced by electrical stimulation of the motor cortices, followed by infusion of an AAV vector  
831 co-expressing hM4Di and EGFP (top inset). Magenta and green arrows indicate early and late  
832 excitation. **b**, Histologic confirmation of AAV transduction with anti-GFP (green) and NeuN (red)  
833 antibodies in monkey K. The brain region indicated by an open box in the left image is enlarged on  
834 the right. **c**, Effects of systemic administration of CNO (1.0 mg/kg, i.v.), DCZ (0.1 mg/kg, i.m.), or  
835 vehicle (VEH) on baseline firing rates of STN neurons. STN activity was normalized based on  
836 activity during the PRE period (from -15 to 0 min) and averaged in 5-min bins (left) and in the  
837 POST periods (right; CNO, from 15 to 25 min; DCZ, from 10 to 25 min). Error bars indicate SEM.  
838 \*  $P < 0.05$ , \*\*  $P < 0.01$ , \*\*\*  $P < 0.001$ , one-tailed Wilcoxon signed rank test with Bonferroni  
839 correction ( $n = 12, 24,$  and  $20$  neurons for monkeys E, K, and U, respectively).

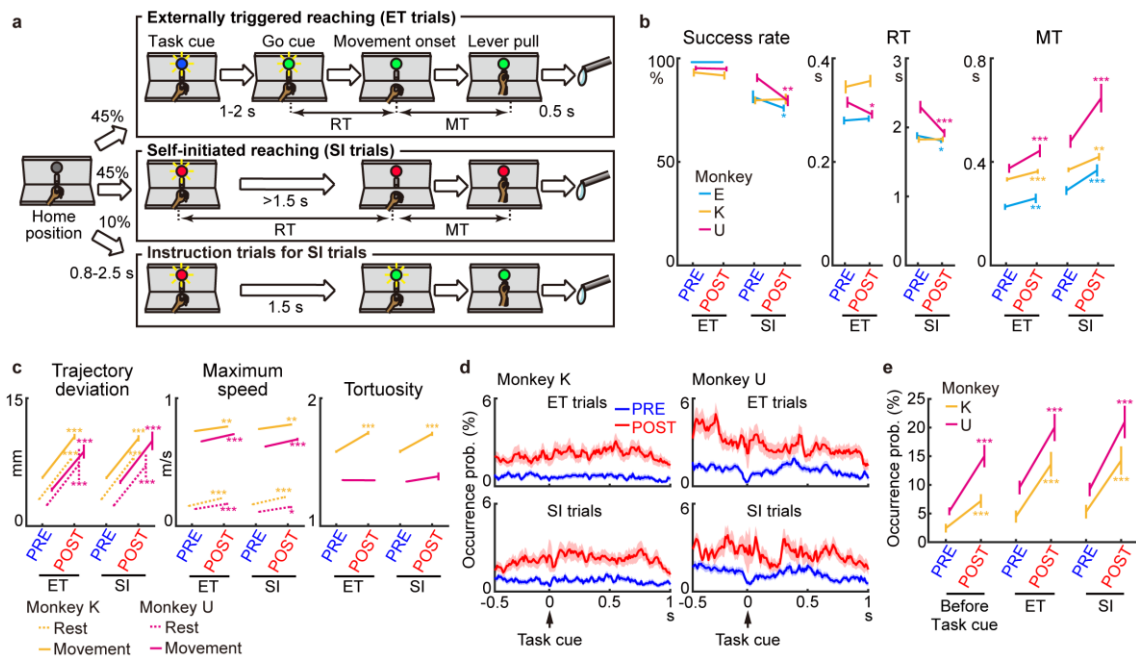

840

841 **Fig. 2 | Motor effects of STN suppression on performance of a reach-and-pull task.** **a**, Custom  
 842 reach-and-pull task. See Online Methods for details. RT, reaction time; MT, movement time. **b**,  
 843 Success rate, RT, and MT during the task using the hand contralateral to the AAV injection side  
 844 before (PRE) and after (POST) the administration of a DREADD ligand. Error bars indicate SEM. \*  
 845 P < 0.05, \*\* P < 0.01, \*\*\* P < 0.001, two-tailed Wilcoxon signed rank test (n = 14, 15, and 20  
 846 sessions for monkeys E, K, and U, respectively). **c**, Analyses of wrist trajectories for monkeys K  
 847 and U. See Supplementary Fig. 3. Trajectory deviation and maximum speed were calculated during  
 848 the period -1 to 0 s relative to Movement onset (Rest), 0 to 1 s (Movement), and tortuosity during  
 849 the period -0.5 to 0.5 s. Error bars indicate SEM. \* P < 0.05, \*\* P < 0.01, \*\*\* P < 0.001, two-tailed  
 850 Mann-Whitney U test (monkey K, 179 ET and 155 SI trials; monkey U, 101 ET and 103 SI trials).  
 851 **d**, Occurrence probability of involuntary movements detected as fluctuations of the home lever (n =  
 852 44 and 43 sessions for monkeys K and U, respectively). Bin width, 1 ms. Shading indicates SEM. **e**,  
 853 Occurrence probability of involuntary movements during the 0.5 s preceding (before Task cue) and  
 854 1 s following Task cue (ET and SI). Error bars indicate SEM. \*\*\* P < 0.001, two-tailed Wilcoxon  
 855 signed rank test.



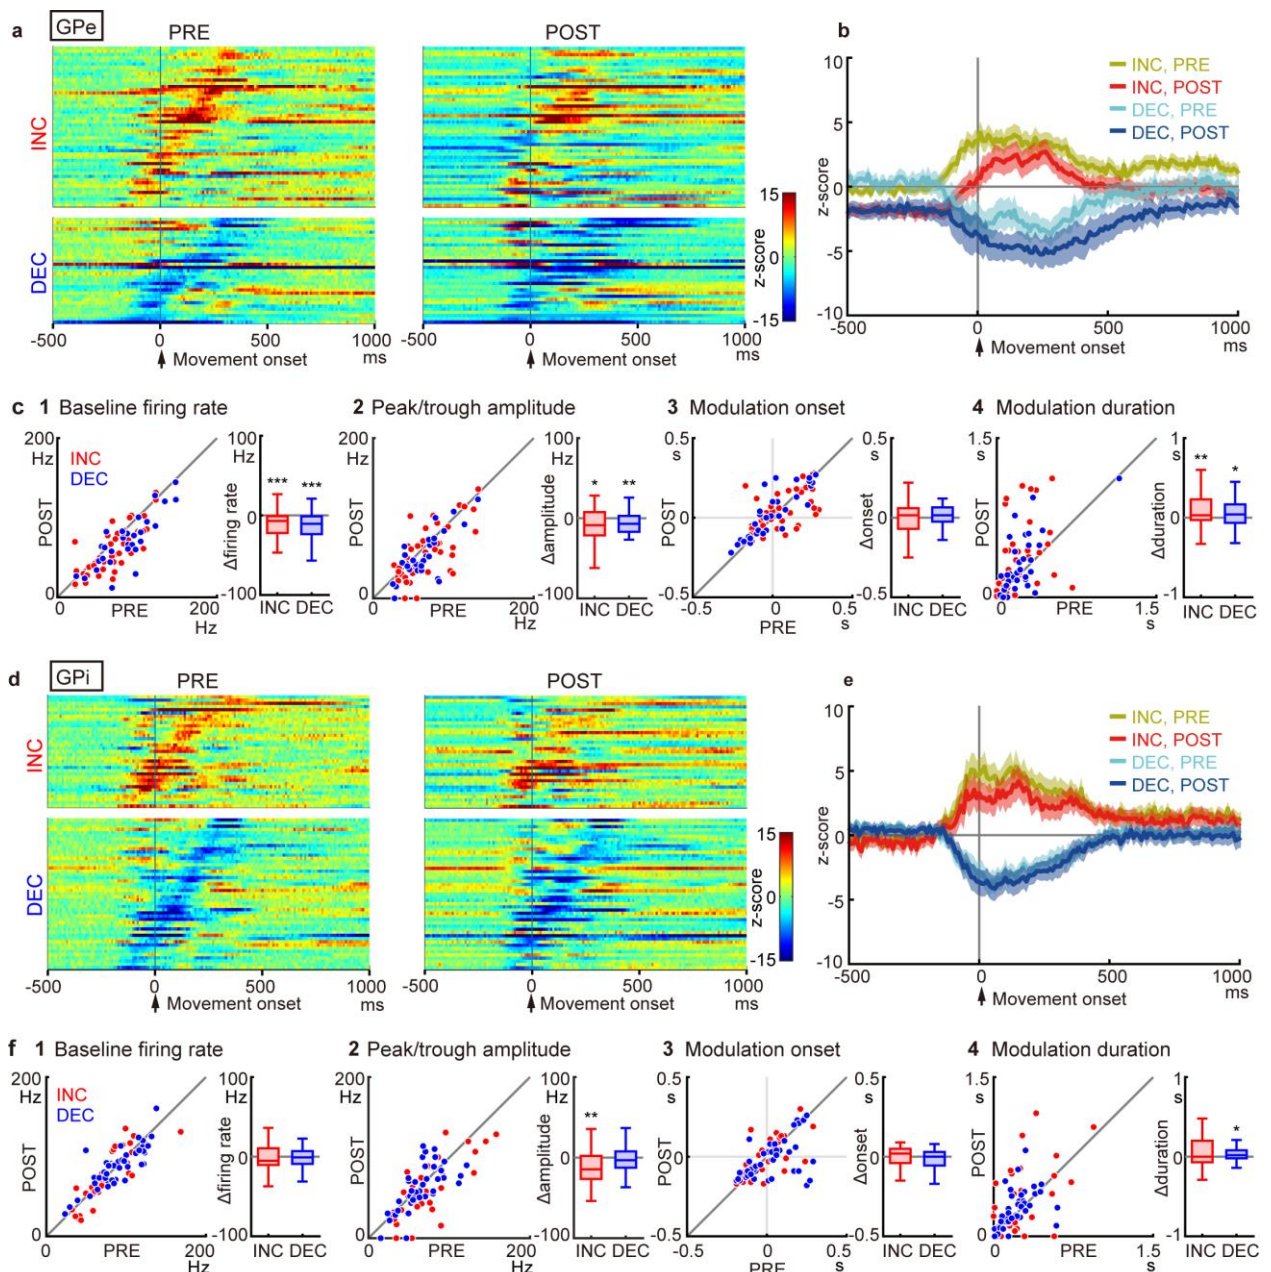

856  
 857 **Fig. 3 | Changes in movement-related activity of GPe/GPi neurons after STN suppression. a,**  
 858 Heat maps for GPe neurons (n = 79) classified as INC or DEC types. Firing rates were converted to  
 859 z-scores using the baseline during the 500 ms preceding Task cue in the PRE period. Neurons are  
 860 sorted by the onset of movement-related activity in the PRE period (left). The activity of the same  
 861 neuron in the POST period is shown on the same row (right). Bin width, 10 ms. **b,**  
 862 Population-averaged PETHs of INC- and DEC-type GPe neurons in the PRE and POST periods.  
 863 Solid lines and shading indicate mean and SEM, respectively. **c,** Change in PETHs between the  
 864 PRE and POST periods. **c1,** baseline firing rate, calculated during the 500 ms preceding Task cue;  
 865 **c2,** peak (INC) or trough (DEC) amplitude of the PETHs; **c3,** onset of movement-related  
 866 modulations; **c4,** duration of movement-related modulations. In each box plot, an inner horizontal  
 867 line indicates median; box, interquartile range (25<sup>th</sup> and 75<sup>th</sup> percentiles); whiskers, maximum and  
 868 minimum values within 1.5 times the interquartile range from the upper and lower quartiles. **d-f,**  
 869 Same as (a-c) but for GPi neurons (n = 78). Error bars indicate SEM. \* P < 0.05, \*\* P < 0.01, \*\*\* P  
 870 < 0.001, two-tailed Wilcoxon signed rank test.

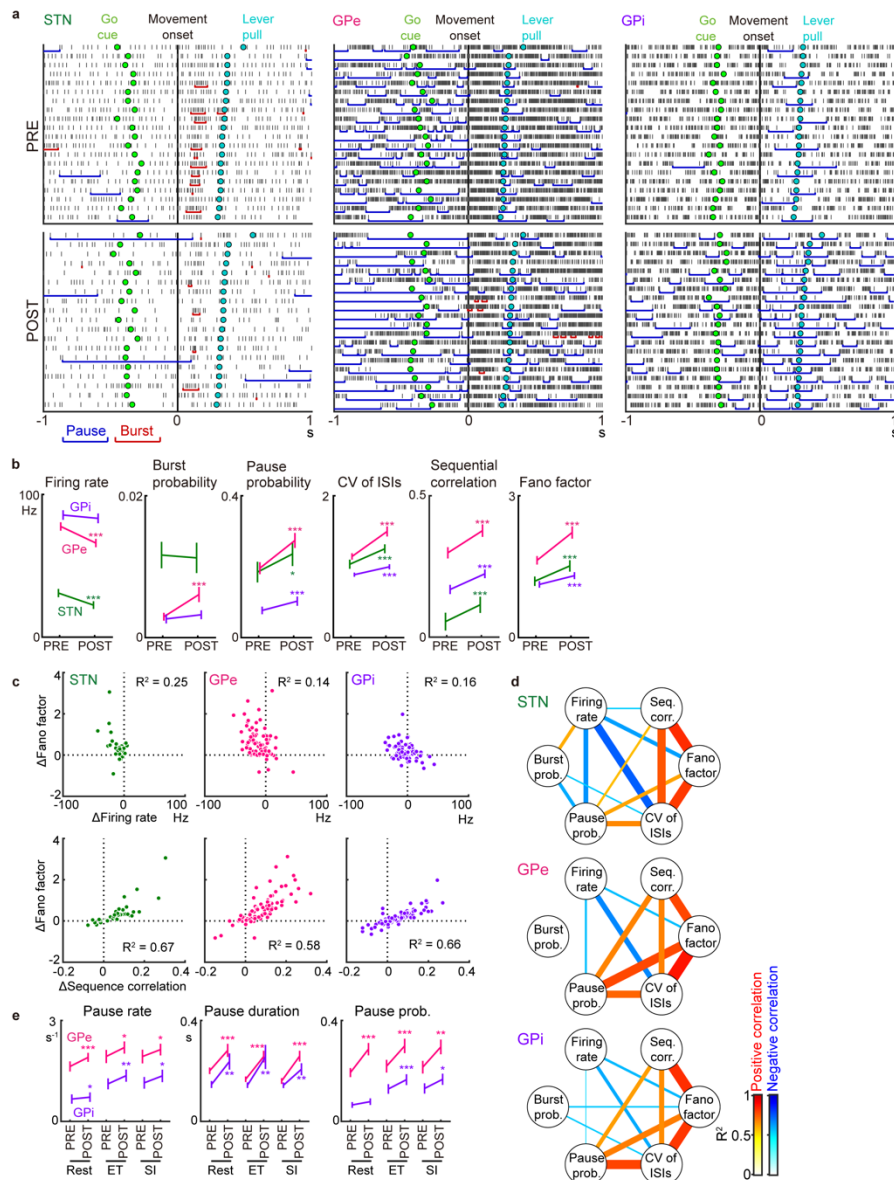

871  
 872 **Fig. 4 | Firing pattern changes in the STN/GPe/GPi after STN suppression.** **a**, Examples of  
 873 STN/GPe/GPi neuronal activity in ET trials in the PRE and POST periods of STN suppression.  
 874 Spikes are aligned with Movement onset, and trials are sorted by MTs. Vertical lines represent  
 875 spikes; horizontal red and blue lines indicate bursts and pauses, respectively. **b**, Statistical analyses  
 876 of spike trains. Firing rate, burst and pause probabilities, CV of ISIs, sequential correlation, and the  
 877 Fano factor were calculated from  $-1$  to  $1$  s relative to Movement onset in both the ET and SI trials.  
 878 Error bars indicate SEM. \*  $P < 0.05$ , \*\*  $P < 0.01$ , \*\*\*  $P < 0.001$ , two-tailed Wilcoxon signed rank  
 879 test ( $n = 44$  STN,  $79$  GPe, and  $78$  GPi neurons). **c**, Correlation between changes in the Fano factor  
 880 and changes in firing rate (above) and sequential correlation (below). Each dot represents a change  
 881 in a firing property of each neuron (POST – PRE).  $R^2$ , squared Pearson correlation. **d**, Network  
 882 representation for all pairwise correlations between the firing properties in **(b)**. Nodes and links  
 883 represent spike parameters and significant correlations, respectively. Line width and color intensity  
 884 indicate the strength of positive (red) and negative (blue) correlations. **e**, Pauses in the GPe/GPi  
 885 during the PRE and POST periods. Pause rate, pause duration, and pause probability were analyzed  
 886 during separate task periods: from  $-0.5$  to  $0$  s relative to Task cue (Rest) and from  $-0.2$  to  $0.3$  s (ET  
 887 and SI) relative to Movement onset.



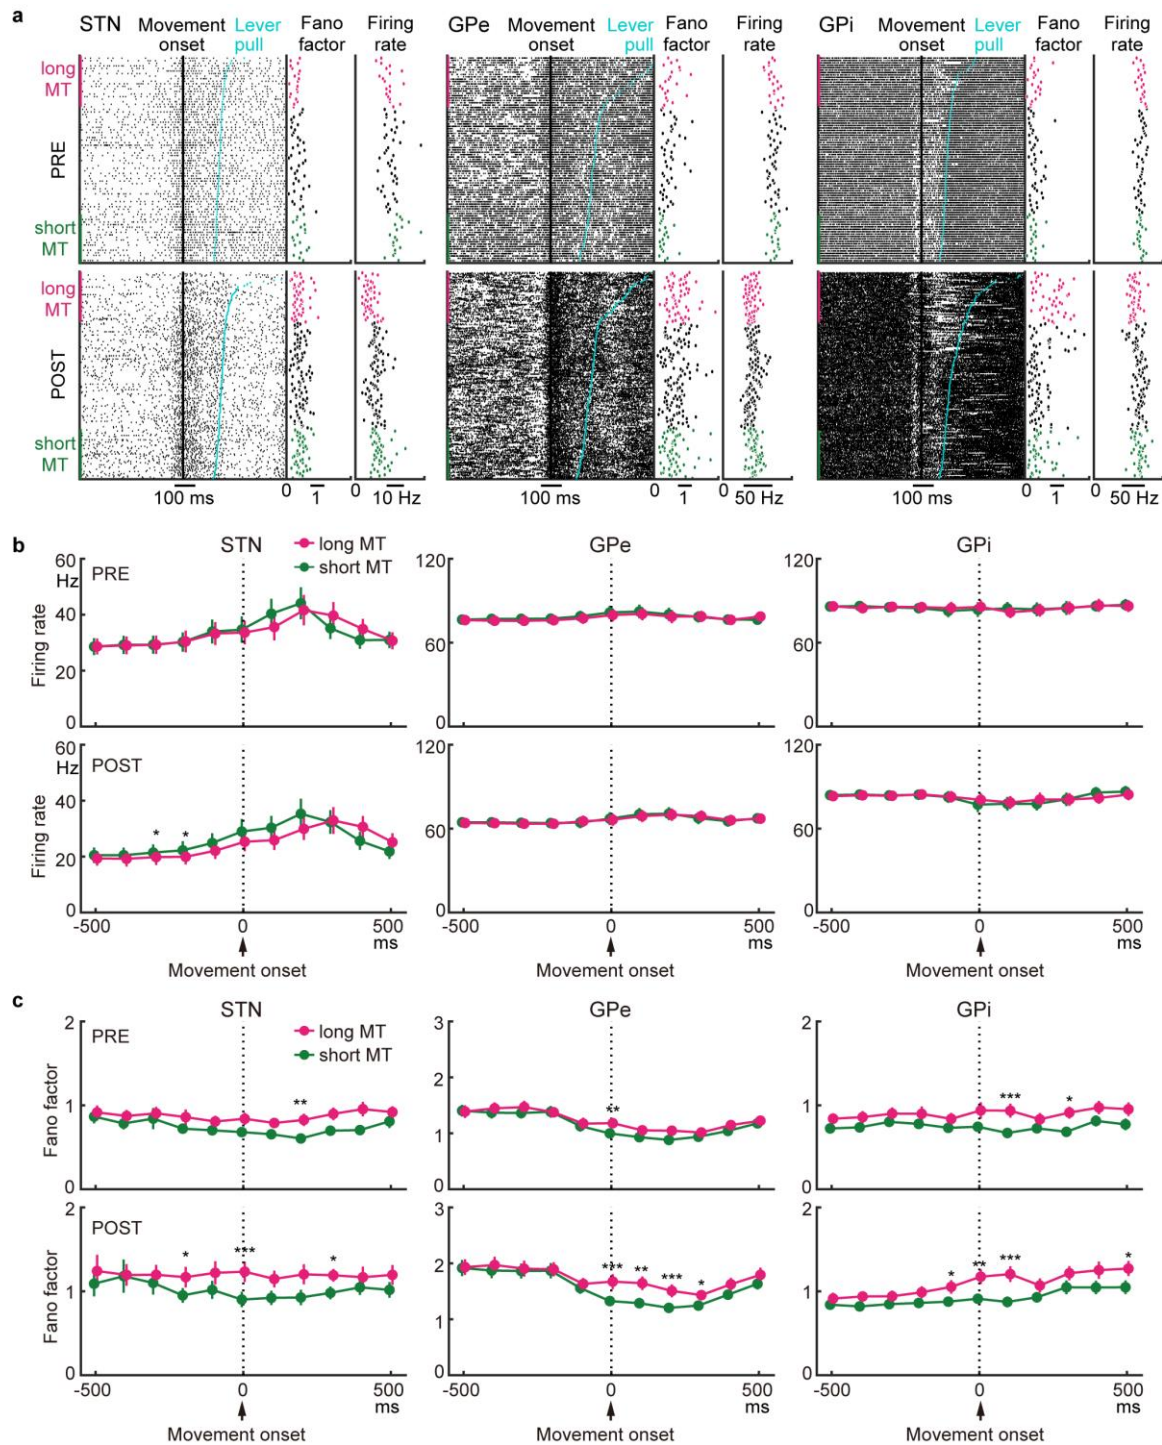

888

889 **Fig. 5 | Neural activity correlated with disturbance in reaching movements after STN**  
 890 **suppression. a**, Examples of STN/GPe/GPi neuronal activity with the Fano factor and firing rate  
 891 calculated in each trial. Spikes are aligned with Movement onset, and trials are sorted by MTs. In  
 892 each neuron, the short- and long-MT trials were defined as trials with MTs below the 25<sup>th</sup> and above  
 893 the 75<sup>th</sup> percentile, respectively. Both ET and SI trials were combined. **b**, Population-averaged firing  
 894 rates of STN/GPe/GPi neurons for the short- and long-MT trials in the PRE and POST periods. **c**,  
 895 Population-averaged Fano factor of STN/GPe/GPi neurons for the short- and long-MT trials in the  
 896 PRE and POST periods. Bin width, 100 ms. Error bars indicate SEM. \*  $P < 0.05$ , \*\*  $P < 0.01$ , \*\*\*  $P$   
 897  $< 0.001$ , two-tailed Wilcoxon signed rank test with Bonferroni correction ( $n = 44$  STN, 79 GPe, and  
 898 78 GPi neurons).

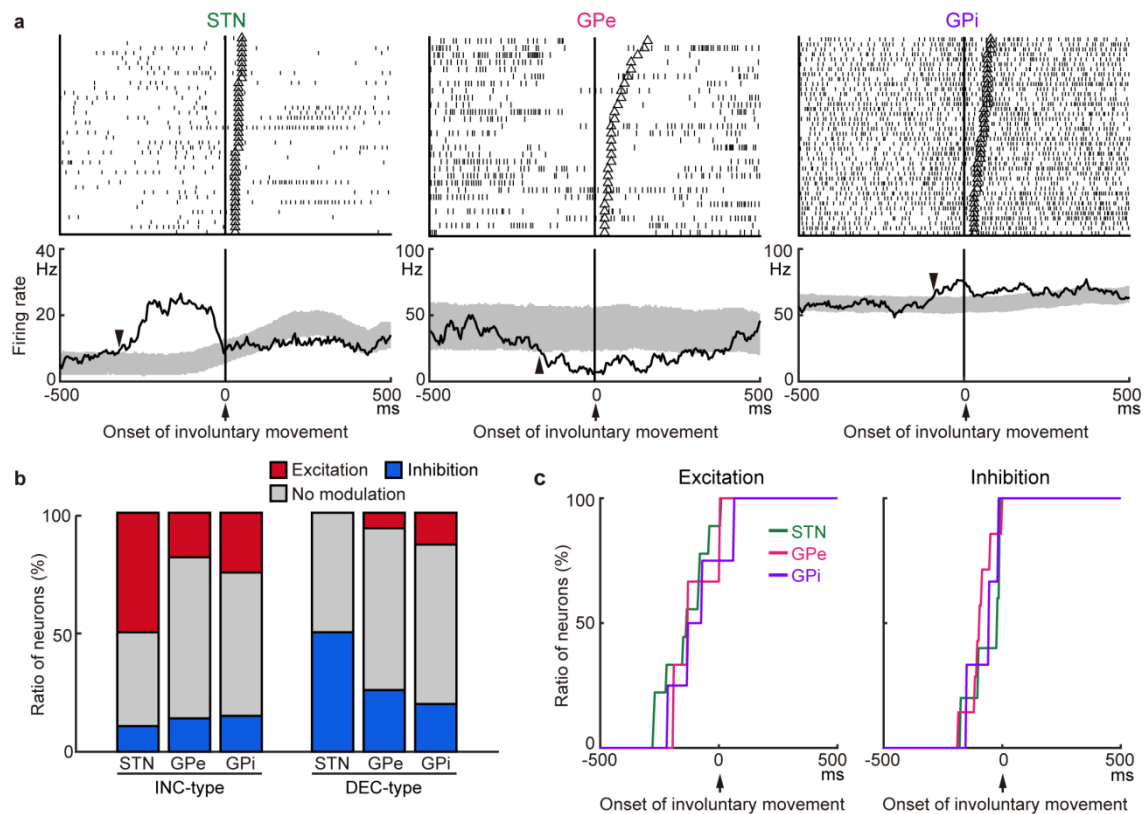

899

900 **Fig. 6 | Neural activity in relation to involuntary movements after STN suppression.** **a**, Typical  
 901 examples of neural activity in the STN/GPe/GPi during involuntary movements. Spikes are aligned  
 902 with the onset of involuntary movements, and trials are sorted by the duration of involuntary  
 903 movements. Open triangles in the raster plots indicate the end of the involuntary movements. In the  
 904 PETHs, a shuffling method was applied to estimate 95% confidence interval (shading), and the  
 905 onset of activity modulation is indicated by arrowheads (-320, -160, and -90 ms for STN, GPe,  
 906 and GPi neurons, respectively). Bin width, 5 ms; averaging window, 40 ms. **b**, Ratios of  
 907 STN/GPe/GPi neurons exhibiting significant excitation or inhibition during involuntary movements  
 908 among INC-type STN (n = 28 neurons), GPe (n = 43), and GPi (n = 20) neurons, and DEC-type  
 909 STN (n = 10), GPe (n = 31), and GPi (n = 30) neurons. **c**, Cumulative histograms of the modulation  
 910 onset timings for the STN/GPe/GPi neurons with excitatory (left) and inhibitory (right)  
 911 modulations.



912 **Table 1 | Number of STN, GPe, and GPi neurons recorded**

| Firing patterns |                         | Monkey |    |    | Total | Firing rate<br>(mean $\pm$ SD, Hz) |
|-----------------|-------------------------|--------|----|----|-------|------------------------------------|
|                 |                         | E      | K  | U  |       |                                    |
| GPe             | HFD-P                   | 0      | 39 | 39 | 79    | 76.3 $\pm$ 29.3                    |
|                 | LFD-B                   | 0      | 4  | 0  | 4     | 10.7 $\pm$ 7.8                     |
|                 | Total                   |        |    |    | 83    |                                    |
| GPi             | HFD                     | 21     | 29 | 28 | 78    | 83.8 $\pm$ 29.1                    |
|                 | Low-frequency discharge | 3      | 1  | 0  | 4     | 11.0 $\pm$ 3.1                     |
|                 | Total                   |        |    |    | 82    |                                    |
| STN             |                         | 0      | 24 | 20 | 44    | 28.3 $\pm$ 16.2                    |

913 Based on firing rates and patterns, GPe and GPi neurons were classified as ‘high-frequency  
 914 discharge and pause’ (HFD-P) GPe, ‘low-frequency discharge and burst’ (LFD-B) GPe,  
 915 ‘high-frequency discharge’ (HFD) GPi, or ‘low-frequency discharge’ neurons. Spontaneous firing  
 916 rates were measured during the 500 ms before Task cue in the PRE period.
